1  
2  
3  
4  
5  
6  
7  
8  
9  
10  
11  
12  
13  
14  
15  
16  
17  
18  
19  
20  
21  
22  
23  
24  
25  
26  
27  
28  
29  
30  
31

## Distinct oncogenes drive distinct genome and epigenome alterations in human mammary epithelial cells

Claire Fonti<sup>#1</sup>, Anne Saumet<sup>#1</sup>, Amanda Abi-Khalil<sup>1</sup>, Béatrice Orsetti<sup>1,2</sup>, William Jacot<sup>2</sup>, Elouan Cleroux<sup>3</sup>, Ambre Bender<sup>3</sup>, Michael Dumas<sup>3</sup>, Emeline Schmitt<sup>1</sup>, Jacques Colinge<sup>1</sup>, Michael Weber<sup>3</sup>, Claude Sardet<sup>1</sup>, Stanislas du Manoir<sup>1</sup>, Charles Theillet<sup>1,2\*</sup>

1. IRCM, Institut de Recherche en Cancérologie de Montpellier, INSERM U1194, Université de Montpellier, Montpellier, F-34298, France
2. ICM, Institut régional du Cancer de Montpellier, Montpellier, F-34298, France
3. CNRS, University of Strasbourg, UMR 7242 Biotechnology and Cell Signaling, 300 Bd Sébastien Brant, CS BP 10413, 67412 Illkirch, France

# equal first authors

\* correspondence to Charles Theillet, IRCM, INSERM U1194, Institut du Cancer de Montpellier 34298 Montpellier cedex 5, France, [charles.theillet@inserm.fr](mailto:charles.theillet@inserm.fr)

**Short title:** Oncogenic pathways impact on genetic changes

### Funding:

This work was supported by the ESCATMO projet blanc from the Agence Nationale pour la Recherche. Anne Saumet was supported by ESCATMO, Claire Fonti by a MESR doctoral fellowship, Amanda Abi-Khalil by the [SIRIC Montpellier Cancer Grant INCa\\_Inserm\\_DGOS\\_12553](#). Michael Weber was supported by the INCa and the European Research Council (ERC Consolidator grant n°615371).

### Interest:

The authors declare no potential conflicts of interest

**Keywords:** breast cancer, oncogene, oncogenic pathways genome, epigenome, modifications, cell type

## 1 **Abstract**

2 Gene expression differences, combined with distinct patterns of genomic  
3 rearrangements and epigenetic modifications, have laid the bases of molecular  
4 classification of breast cancer. Different molecular subtypes are thought to originate  
5 from different cell lineages in the mammary gland, but the early activation of an  
6 oncogene could also play a role. It is, however, difficult to discriminate the respective  
7 inputs of oncogene activation or cell type of origin in the natural history of the tumor.  
8 In this work, we have designed an experimental strategy aiming at determining  
9 whether activation of distinct oncogenic pathways in human mammary epithelial cells  
10 (HMEC) could lead to different patterns of genetic and epigenetic changes. We show  
11 that initial activation of CCNE1, WNT1 and RASv12, which activate distinct oncogenic  
12 pathways, in shp53 immortalized HMECs results in different and reproducible profiles  
13 of mRNA and miRNA expression, copy number alterations (CNA) and DNA methylation  
14 modifications. Noticeably, HMECs transformed by RAS bore very specific profiles of  
15 CNAs and DNA methylation, clearly distinct from those shown by CCNE1 and WNT1  
16 transformed HMECs.

17 Genes impacted by CNAs and CpG methylation in the RAS and the CCNE1/WNT1  
18 clusters showed clear differences, illustrating the activation of distinct pathways. Our  
19 data show that early activation of distinct oncogenic pathways leads to active adaptive  
20 events resulting in specific sets of CNAs and DNA methylation changes. We, thus,  
21 propose that activation of different oncogenes could have a role in reshaping the  
22 genetic landscape of breast cancer subtypes.

23 240 words

## 24 **Author summary**

25 Genetic and epigenetic changes are at the center of cancer development. Breast  
26 cancer molecular subtypes are defined on differences in genetic and epigenetic  
27 profiles and it is generally assumed these subtypes originate from different cell  
28 lineages in the mammary gland. We propose that founding oncogenic mutations could  
29 also have an impact. To address this question, we designed an experimental model,  
30 based on the ectopic expression of different oncogenes in human mammary epithelial  
31 cells (HMEC), and monitored genetic and DNA methylation changes occurring at  
32 different stages of cell transformation. We show that transformation of HMEC by  
33 distinct oncogenes resulted in clearly different and reproducible patterns of genetic  
34 and DNA methylation changes. Genes whose expression was modified by either CNAs  
35 or CpG methylation were consistent with the dominant pathways activated and

1 reflected the phenotypes in the respective models. We propose that DNA methylation  
2 and CNA changes correspond to adaptive responses to the activation of the oncogenic  
3 pathways. Our data strongly suggest that early activation of distinct oncogenic insults  
4 will not only impinge on the phenotypic characteristics of the resulting tumors, but  
5 also have a strong impact on their genomic and epigenetic landscapes.

6

7

1 *7088 words (including Introduction, Results, Discussion, Mat-Meth, Figure legend)*

## 2 **Introduction**

3 Genetic instability lies at the core of neoplastic development with up to 85% of human  
4 cancers showing loss of chromosome integrity at varying levels such as aberrant copy  
5 numbers and aneuploidy. Chromosomal instability has been observed in early stages  
6 of cancer [1] and rearrangement intensity correlated with disease aggressiveness [2].  
7 In addition to structural defects, cancer genomes undergo important epigenetic  
8 changes occurring at the chromatin and DNA levels [3]. At the DNA level, cancer  
9 associated epigenetic modifications involve genome wide cytosine methylation  
10 changes corresponding to demethylation of repetitive DNA sequences and  
11 hypermethylation of CpG enriched sequences. While demethylation of repetitive DNA  
12 has been proposed to favor chromosomal instability, hypermethylation of CpG rich  
13 promoter sequences has been associated with gene expression changes[4,5].  
14 Genetic instability results in stochastically occurring aberrations, of which a fraction  
15 will be selected according to the survival or growth advantage they confer to the cells.  
16 Hence, profiles of somatically acquired genetic and epigenetic changes and associated  
17 RNA expression patterns in tumors reflect the combined interactions of genetic  
18 instability and selective pressure. As a consequence, recurrent profiles of genomic and  
19 epigenetic aberrations should in most cancers be structured around a set of anomalies  
20 that confer maximum advantage in a given tissue and environment. Noticeably,  
21 cancers of distinct anatomical origins exhibit quite different profiles of genomic and  
22 epigenetic anomalies [6]. Recent work by Sack and coworkers [7], who screened  
23 human open reading frame libraries in 3 different cell types to identify proliferation  
24 drivers, elegantly showed the existence of a tissue specific bias in the selection of gain  
25 of function and, conversely, the counter-selection of suppressor genes.  
26 In breast cancer, molecular subtypes were defined on the basis of RNA expression, as  
27 well as of genomic anomalies and DNA methylation differences [8-11]. Although  
28 definitive proof is still missing, it is generally proposed that the genetic and epigenetic  
29 differences in different breast tumor subtypes are dictated by distinct cell types of  
30 origin [8,9]. Early activation of distinct oncogenic pathways in a single cell type could  
31 also have an impact on genomic and epigenetic changes and induce the selection of  
32 anomalies functionally coherent with the activated pathway [12-15]. This is supported  
33 by studies showing that expression of RASv12 and of BRAFv600 resulted in the  
34 transcriptional repression and hypermethylation of distinct gene sets, involving  
35 different cascades of repressors and DNA methylases [16,17]. Yet, it has not been

1 experimentally demonstrated that distinct oncogenic events could lead to specific  
2 genomic rearrangements.  
3 In this work, we sought to determine the impact of the early activation of distinct  
4 oncogenic pathways on genomic and epigenetic changes in immortalized human  
5 mammary epithelial cells (HMECs). To this aim, we overexpressed by retroviral  
6 transduction three oncogenes WNT1, CCNE1 and RASv12, known to activate different  
7 oncogenic pathways, in shp53 immortalized human HMECs and monitored epigenetic  
8 and genetic changes at different steps of cancer progression. The sequence of genetic  
9 and epigenetic alterations accompanying the transition between the normal and  
10 transformed states show that activation of these distinct oncogenes leads to the  
11 emergence of distinct and specific profiles of changes. These results thus support a  
12 model in which genetic and epigenetic changes in cancer cells reflect adaptive  
13 responses to the oncogenic driver.  
14  
15  
16

## 1 **Results**

### 2 ***Establishment of the cellular model of stepwise transformation***

3 Primary human mammary epithelial cells (HMEC) were isolated from fresh mammary  
4 tissue obtained from donors undergoing reductive plastic surgery (details in  
5 Supplementary Methods). We obtained 3 stable cell cultures that could be propagated  
6 for at least 15 passages, before cells started showing signs of senescence such as  
7 reduced proliferation, enlarged morphology with large vacuoles and positive  $\beta$ -  
8 galactosidase staining (S1A Fig). Of the 3 primary HMEC lines, we selected the R2 line  
9 to establish our models of stepwise cell transformation. As depicted in Fig 1A, cells  
10 were genetically modified by sequential retroviral transductions with defined genetic  
11 elements. In the first (immortalization) step, we transduced a vector expressing an  
12 shRNA targeting the *TP53* gene (designated shp53 hereafter), which plays a key role  
13 in the senescence barrier. The shp53 efficiently knocked-down p53 protein expression  
14 and signaling (S2 Fig) and gave rise to rapidly growing cultures with a short lag period  
15 after infection. We derived three stable shp53 HMEC sublines, which we will refer to as  
16 R2<sup>shp53</sup> and used as models in this work. The three shp53 sublines showed reduced  
17 levels of  $\beta$ -galactosidase staining, re-expression of the endogenous *hTERT* and  
18 stabilization of telomere length, indicating that the senescence program had been  
19 overcome (Fig 1B-C, S1B-C Fig). In the second step, two of these R2<sup>shp53</sup> sublines  
20 were independently transduced with vectors expressing either the *CCNE1*, *WNT1* or  
21 *HRAS*<sup>v12</sup> oncogenes. These oncogenes were selected because of their known  
22 transformation potential in human cells and because they belonged to distinct  
23 signaling pathways. Oncogene expressing cells were expanded in culture and several  
24 independent sublines were derived for each oncogenic situation (R2<sup>shp53-WNT1</sup>, R2<sup>shp53-</sup>  
25 *CCNE1*, R2<sup>shp53-RAS</sup>). In the next step, each subline was seeded in soft agar to determine  
26 anchorage independent growth as a standard read out of *in vitro* transformation (S1D  
27 Fig). Cell clones were isolated from soft agar foci and expanded (R2<sup>shp53-WNT1.SA</sup>, R2<sup>shp53-</sup>  
28 *CCNE1.SA*, R2<sup>shp53-RAS.SA</sup>). Hereafter, we will refer to R2<sup>shp53</sup> transduced with an oncogene  
29 as pre-transformed for cells before soft agar cloning and as transformed after soft  
30 agar cloning. In total, we established 16 HMEC sublines (S appendix) corresponding to  
31 different steps of cancer transformation; immortalized (R2<sup>shp53</sup>), pre-transformed  
32 (R2<sup>shp53-*oncogene*</sup>) and transformed (R2<sup>shp53-*oncogene.SA*</sup>).

33

### 34 ***Genetic instability in the immortalized and transformed cell lines***

35 Of the 16 established sublines, 8 were characterized at early and late passages.

1 We first analyzed the primary, immortalized, pre-transformed and transformed HMEC  
2 sublines by array-CGH. Using the fraction of the genome involved in copy number  
3 alterations (CNAs) as a metric, it was noticeable that the level of genetic instability  
4 gradually increased between the immortalized R2<sup>shp53</sup> and the transformed R2<sup>shp53-</sup>  
5 WNT1.SA, R2<sup>shp53-CCNE1.SA</sup> and R2<sup>shp53-RAS.SA</sup> sublines (Fig 2A). Indeed, the fraction of the  
6 genome involved in CNA increased from 2 to 6% in R2<sup>shp53</sup> HMECs between early (50  
7 days after transduction) and late passages (300 days). CNAs doubled (12-13% of the  
8 genome) in R2<sup>shp53-WNT1</sup>, R2<sup>shp53-CCNE1</sup> and R2<sup>shp53-RAS</sup> in comparison to R2<sup>shp53</sup> HMECs and  
9 peaked in R2<sup>shp53-WNT1.SA</sup> and R2<sup>shp53-CCNE1.SA</sup> at 22 and 27% of the genome respectively  
10 (Fig 1D). Interestingly, the patterns of CNA progression were coherent with ploidy  
11 changes in these sublines. Indeed, chromosome counts performed on metaphase  
12 spreads revealed that R2<sup>shp53</sup> HMECs presented 92 chromosomes indicative of  
13 tetraploidy. Remarkably, while all R2<sup>shp53-RAS</sup> HMECs clones remained strictly tetraploid,  
14 R2<sup>shp53-CCNE1</sup> and R2<sup>shp53-WNT1</sup> sublines became aneuploid with chromosome counts  
15 ranging from 78 to 110 (Fig 1E). To determine whether increased CNA levels were  
16 associated to an elevation of genetic stress, we performed immunofluorescence  
17 staining of  $\gamma$ H2Ax and 53BP1 in R2, R2<sup>shp53</sup> and R2<sup>shp53-oncogene</sup> HMECs (S3A-B Fig). Two  
18 types of  $\gamma$ H2Ax staining patterns were observed; nuclear foci, considered as markers  
19 of DNA breaks, and pan-nuclear staining, which has been proposed to reveal  
20 widespread replication stress in the absence of double strand breaks [18]. In  
21 immortalized R2<sup>shp53</sup> HMECs, we predominantly observed pan-nuclear  $\gamma$ H2AX staining  
22 and low levels of  $\gamma$ H2Ax and 53BP1 foci, suggesting an elevation of genetic stress but  
23 low levels of DNA breaks in these cells. This contrasted with R2<sup>shp53-CCNE1</sup> and R2<sup>shp53-</sup>  
24 WNT1, which essentially displayed  $\gamma$ H2Ax and 53BP1 nuclear foci (S3A-B Fig), consistent  
25 with a distinguishable increase of DNA breaks in these cells confirmed by comet-assay  
26 (S3C-D Fig). Of note, R2<sup>shp53-RAS</sup> showed distinctly lower levels of  $\gamma$ H2Ax and 53BP1  
27 nuclear foci and low levels of DNA breaks by comet-assay relative to R2<sup>shp53-CCNE1</sup> and  
28 R2<sup>shp53-WNT1</sup>.

### 29 ***Immortalized and transformed HMECs form 3 distinct clusters defined by the*** 30 ***activated oncogene***

31 Next, we determined whether the different immortalized and transformed HMEC  
32 sublines presented distinct profiles of genetic and epigenetic anomalies. Copy Number  
33 Alterations (CNA), DNA Methylation, miRNA (miR) and mRNA expression levels were  
34 determined at different steps of cell immortalization and transformation. To integrate  
35 these data corresponding to diverse molecular features and different technological  
36 platforms and increase the possibility of discovering coordinated changes, we used

1 moCluster (moGSA package), a multivariate single sample gene-set analysis method,  
2 developed to produce integrative clustering on multiple omics data. In brief, this  
3 approach is based on multivariate latent variable decomposition to discover correlated  
4 global variance structure across datasets [19].

5 Two independent biological replicates of each immortalization or transformation step,  
6 (R2, R2<sup>shp53</sup>, R2<sup>shp53-WNT1</sup>, R2<sup>shp53-CCNE1</sup>, R2<sup>shp53-RAS</sup> and R2<sup>shp53-WNT1.SA</sup>, R2<sup>shp53-CCNE1.SA</sup>,  
7 R2<sup>shp53-RAS.SA</sup> HMECs) were included in this analysis. These analyses pointed at  
8 similarities and differences between distinct sublines and stages of transformation.  
9 These were determined by means of Principal Component Analysis (PCA). Changes  
10 defining the most variant PCA vector were subsequently analyzed by Ward clustering.  
11 The combined analysis of the four datasets (CNA, DNA methylation, mRNA and miRNA  
12 expression) defined 3 clusters. The first one, at the trunk, organized around R2 and  
13 R2<sup>shp53</sup> early and late passages. The second corresponded to the four R2<sup>shp53-RAS</sup>  
14 sublines. The third cluster included R2<sup>shp53-WNT1</sup> and R2<sup>shp53-CCNE1</sup> sublines (Fig 2A). The  
15 number of clusters was confirmed by Nbclust (Fig 2B and S Appendix for details).  
16 Hence, the MoGSA analysis revealed that the HMEC sublines transduced with different  
17 genetic elements showed clear differences in their genetic and epigenetic patterns. We  
18 next analyzed CNAs, DNA methylation, mRNA and miRNA datasets individually in  
19 order to verify whether the differences in patterns applied similarly to all datasets.

### 20 **Overexpression of CCNE1, WNT1 or HRAS<sup>V12</sup> oncogenes in immortalized** 21 **HMECs result in distinct profiles of copy number alterations**

22 Genomic regions involved in CNAs were identified with the Nexus 7.5 Software  
23 (Biodiscovery, CA., USA) and only CNAs covering at least 2 Mb were used in the  
24 moGSA analysis. The PCA classification of the different HMEC sublines singled out  
25 three clusters. Cluster 1 positioned at the trunk encompassed R2 and R2<sup>shp53</sup>  
26 replicates, cluster 2 formed by the R2<sup>shp53-RAS</sup> and R2<sup>shp53-RAS.SA</sup> sublines and a more  
27 dispersed cluster 3 comprising R2<sup>shp53-WNT1</sup>, R2<sup>shp53-CCNE1</sup>, R2<sup>shp53-WNT1.SA</sup> and R2<sup>shp53-</sup>  
28 <sup>CCNE1.SA</sup> (Fig 3A). The distance along the PC1 vector in the principal component  
29 analysis, separating cluster 2 from cluster 3, illustrated the strong differences at the  
30 CNA level between the RAS and the WNT1 or CCNE1 transformed sublines (Fig 3A).  
31 A clustering analysis of the CNAs defining the PC1 vector identified co-occurring loss  
32 of chromosome 4, loss at 8p and gain at 8q as the most significant anomalies  
33 characterizing the R2<sup>shp53-RAS</sup> HMECs (Fig 3B). Other events were gains at 12q and  
34 losses at 14 and 18q (S4A-B Fig). In clear contrast, R2<sup>shp53-WNT1</sup> and R2<sup>shp53-CCNE1</sup>  
35 HMECs were characterized by losses at chromosomes 2, 3 and 6, as well as focal  
36 gains at 11q13 and 20q13 (Fig 3B and S4A-B Fig). Interestingly, whereas the pre-



1 transformed R2<sup>shp53-RAS</sup> showed little difference with their transformed R2<sup>shp53-RAS.SA</sup>  
2 counterpart, significant deviation was detected between R2<sup>shp53-CCNE1</sup> and R2<sup>shp53-  
3 CCNE1.SA</sup>, as well as between R2<sup>shp53-WNT1</sup> and R2<sup>shp53-WNT1.SA</sup>, with additional gains at  
4 chromosome 11q13-q14 and 20q11-q13, respectively (Fig 3B). Together with the  
5 global increase in the fraction of the genome involved in CNAs, these data suggested  
6 an increase of genetic instability in R2<sup>shp53-CCNE1.SA</sup> and R2<sup>shp53-WNT1.SA</sup> (Fig 1D). In  
7 contrast, R2<sup>shp53-RAS</sup> HMECs did not show significant changes in CNAs after soft agar  
8 cloning (Fig 1D and Fig 3B).

### 9 10 **Overexpression of CCNE1, WNT1 or HRAS<sup>v12</sup> oncogenes in immortalized** 11 **HMECs result in distinct profiles of DNA methylation**

12 DNA methylation profiles of the HMEC sublines were analyzed at the single-base  
13 resolution level by reduced representation bisulfite sequencing (RRBS). Variations in  
14 methylation levels were quantified at sequences containing at least 5 contiguous CpG  
15 pairs genome-wide. A global increase and change in distribution of the methylation  
16 pattern was clearly detected between primary R2 HMECs and all the sublines derived  
17 there from (Fig 4A). Variations were particularly pronounced in transformed cells after  
18 soft agar cloning (R2<sup>shp53-RAS.SA</sup>, R2<sup>shp53-CCNE1.SA</sup> and R2<sup>shp53-WNT1.SA</sup>). This increase in CpG  
19 methylation suggested a global DNA methylation reprogramming in shp53  
20 immortalized and oncogene transformed HMECs. Using a methylation difference of 0.2  
21 as inclusion criterion, we next performed a SAMR analysis of these data to identify  
22 differentially methylated regions (DMRs) that varied most significantly between  
23 sublines. Identified DMRs were analyzed in moGSA and used to classify cell lines by  
24 Principal Component Analysis (PCA). The PCA classification based on DNA methylation  
25 was remarkably similar to that generated with CNAs. Here again R2<sup>shp53-RAS</sup> and  
26 R2<sup>shp53-RAS.SA</sup> defined a clearly distinct cluster of the R2<sup>shp53-CCNE1</sup>, R2<sup>shp53-WNT1</sup>, R2<sup>shp53-  
27 CCNE1.SA</sup> and R2<sup>shp53-WNT1.SA</sup> cluster (Fig 4B). Additional clustering analysis of the DMRs  
28 centered on CpGs methylation patterns, confirmed this trend, R2<sup>shp53-RAS</sup> HMECs  
29 showing an almost binary difference when compared to R2<sup>shp53-CCNE1</sup> and R2<sup>shp53-WNT1</sup>  
30 (Fig 4C). Noticeably, primary R2 and immortalized R2<sup>shp53</sup> (Early and Late passages)  
31 clustered at the trunk (cluster 1 in Fig 4B).

32 Altogether, both CNA and DNA methylation profiles indicated that the ectopic  
33 expression of an oncogenic form of RAS in R2<sup>shp53</sup> HMECs induced specific genomic and  
34 epigenetic alterations, that markedly differed from those observed in HMECs  
35 transduced with WNT1 or CCNE1. Interestingly, in the same analyses WNT1 or CCNE1

1 transformed HMECs co-clustered in both classifications, suggesting these two  
2 oncogenic events result in globally similar adaptive programs.

3 ***Overexpression of CCNE1, WNT1, or HaRAS<sup>v12</sup> oncogenes in R2<sup>shp53</sup> HMECs***  
4 ***result in distinct transcriptional programs and phenotypical cell fates.***

5 We next analyzed the mRNA and miRNA expression profiles. As observed with CNA  
6 and DNA methylation profiles, cluster analyses of both miR and mRNA expression  
7 profiles clearly distinguished the RAS and CCNE1/WNT1 transformed cells in two  
8 separate clusters (Fig 5A and Fig 5C). We observed that many genes presented an  
9 inverted pattern of expression in the RAS compared to the CCNE1/WNT1 sublines (Fig  
10 5B and Fig 5D) in the Ward clustering analysis of expression changes defined by the  
11 PC1 vector in the miR and mRNA datasets. GeneGo Metacore (Thompson Reuter)  
12 network analyses of the miR and mRNA gene lists that discriminated cluster 2 and  
13 cluster 3 identified several differentially activated functional gene networks. Based on  
14 the miR dataset, this analysis clearly pointed at strong differences in EMT-associated  
15 pathways (S5 Fig), illustrated by the level of miR200c, a well characterized regulator  
16 of the expression of the EMT transcription factor ZEB1 [20], and the mesenchymal  
17 cell-specific miR143/miR145, that differed markedly between RAS and CCNE1/WNT1  
18 cells [21]. Morphological features (cuboidal vs. fusiform) and immunofluorescence  
19 staining of cells for the epithelial E-Cadherin (ECAD) and the mesenchymal Vimentin  
20 (VIM) markers, confirmed that primary R2, immortalized R2<sup>shp53</sup>, and transformed  
21 R2<sup>shp53-CCNE1</sup> and R2<sup>shp53-WNT1</sup> cells all maintained an epithelial phenotype (cuboid,  
22 ECAD<sup>high</sup>, VIM<sup>low</sup>), while R2<sup>shp53-RAS</sup> cells were fusiform, ECAD-negative and VIM<sup>high</sup>  
23 indicating a clear mesenchymal conversion (S6 Fig).

24 ***Chronology of the genetic and epigenetic changes occurring during***  
25 ***transformation of HMECs.***

26 Monitoring the genetic and epigenetic changes occurring at each step of the cell  
27 transformation process allowed us to reconstruct their chronology. This could be  
28 inferred from the PC2 vectors in the PCA classifications. Starting from normal R2  
29 primary cells, moving to early and late immortalized cells and then to anchorage  
30 independent cells growing in soft agar, we noted that the different sublines bore  
31 different positions in these classifications according to the dataset considered. In the  
32 miR classification, the immortalized R2<sup>shp53</sup> (Early and Late passages) were separated  
33 from primary R2 and co-clustered with R2<sup>shp53-CCNE1</sup> and R2<sup>shp53-WNT1</sup> (Fig 5A). In  
34 contrast, in the mRNA-based and DMR classifications, primary R2 co-clustered with  
35 early passage R2<sup>shp53</sup> cells. Late passage R2<sup>shp53</sup> had undergone changes that brought  
36 them closer to R2<sup>shp53-CCNE1</sup> and R2<sup>shp53-WNT1</sup> (Fig 4B and Fig 5C). Finally, the

1 classification based on CNAs, revealed that early and late passages R2<sup>shp53</sup> co-  
2 clustered with R2 (Fig 2B). These co-clustering analyses suggested a temporal  
3 hierarchy of the genetic and epigenetic events that primed transformation in our  
4 models. The clear clustering differences observed between early and late passage  
5 R2<sup>shp53</sup> cells according to either the miR, mRNA, DMR or CNA datasets, strongly  
6 suggested that upon p53 inactivation in HMECs, miR expression was the first to be  
7 modified, whilst the modification of mRNA expression profiles and massive  
8 modifications of the methylation landscape occurred later. Upon transduction with  
9 RAS, WNT1 or CCNE1, additional DNA methylation changes occurred concomitantly  
10 with modifications in mRNA expression. Copy number changes emerged last and  
11 underwent a clear selection process during soft agar cloning (Fig 2B and S4A Fig).

### 12 **Impact of copy number changes and differential DNA methylation on gene** 13 **expression.**

14 First, we identified 2182 genes whose expression change was correlated to CNAs and  
15 in a second time selected the genes that were differentially expressed in the RAS or  
16 the CCNE1/WNT1 clusters compared to R2 and R2<sup>shp53</sup> HMECs. We noted that genes  
17 with copy number dependent expression change in the R2<sup>shp53-RAS</sup> showed very little  
18 overlap with those modified in R2<sup>shp53-CCNE1</sup>/R2<sup>shp53-WNT1</sup>, since only 2 (1.7%) genes  
19 were present in both lists (S7A Fig). This absence of significant overlap could not have  
20 happened by chance (hypergeometric test, p=0.75). In the R2<sup>shp53-RAS</sup>, we identified  
21 90 genes (36 overexpressed in regions of gain and 54 underexpressed in regions of  
22 loss) differentially expressed relative to R2 and R2<sup>shp53</sup> HMECs. Similarly, 156 genes  
23 (118 overexpressed in regions of gain, 38 underexpressed in regions of loss) were  
24 differentially expressed in the R2<sup>shp53-CCNE1</sup>/R2<sup>shp53-WNT1</sup> cluster compared to R2 and  
25 R2<sup>shp53</sup>. A large proportion of these genes mapped in the CNA regions that were most  
26 discriminating to either R2<sup>shp53-RAS</sup> (65% in the gain at chromosome 8 or loss at  
27 chromosome 4) or to R2<sup>shp53-CCNE1</sup>/R2<sup>shp53-WNT1</sup> (58% in the gains at 8p21, 11q13,  
28 17q21 or 20q11-q13, losses at 6q) (S1 Table). We also noted that 78 genes, gained  
29 and overexpressed in either R2<sup>shp53-RAS</sup> or R2<sup>shp53-CCNE1</sup>/R2<sup>shp53-WNT1</sup> HMECs were part of  
30 the gene list previously reported to be associated with common regions of  
31 amplification in breast cancer [22]. This enrichment was highly significant  
32 (hypergeometric test p= 1.10<sup>-13</sup>) and suggested that our HMEC stepwise  
33 transformation models shared genetic pathways with breast cancer.

34 We selected the genes annotated as cancer genes (oncogenes and tumor  
35 suppressors) and for R2<sup>shp53-RAS</sup> HMECs added genes belonging to the RAS pathway  
36 (Fig 6A and S1 Table). In the R2<sup>shp53-RAS</sup> cluster, this revealed 5 gained and over-

1 expressed (*ERBB2*, *HEY1*, *PLAG1*, *ZBTB10*, *CRTC3*), all known oncogenes, and 6 lost  
2 and under-expressed genes. Of the 6 lost and under-expressed genes, 4 were  
3 components of a RAS pathway (*TMEM154*, *LRAT*, *AKAP6*, *MTUS1*) and 2 were cancer  
4 suppressor genes (*FBXW7*, *SERPINB5*). *FBXW7* encodes an ubiquitin ligase that  
5 regulates negatively transcription factors such as MYC, FOS or NOTCH [23], whereas  
6 *SERPINB5* (*MASPIN*) is described as a metastasis suppressor in breast and other  
7 cancers [24].

8 In the  $R2^{\text{shp53-CCNE1}}/R2^{\text{shp53-WNT1}}$  cluster, we identified 13 genes, 5 gained and over-  
9 expressed, 8 lost and under-expressed (Fig 6A). All 13 genes classified as cancer  
10 genes. Of the 5 gained and over-expressed genes, *NUMA1*, *PMS2* and *CUX1* have well  
11 documented roles in mitotic spindle assembly or DNA repair and *STAT3* is a key  
12 signaling node for a number of growth factors and cytokines frequently involved in  
13 cancer [25]. *PLAG1* was selected both in the RAS and CCNE1/WNT1 upregulated  
14 genes, but its expression level was 9 time higher in  $R2^{\text{shp53-RAS}}$  compared to  $R2^{\text{shp53-}}$   
15  $CCNE1/R2^{\text{shp53-WNT1}}$ . Of the 8 lost and under-expressed genes in the CCNE1/WNT1  
16 cluster, we noted *LATS1*, negative regulator of the Hippo pathway, *CTNNB1* ( $\beta$ -  
17 catenin), the *SRC* homolog *FYN* and *TGFBR2*.

18 Using a similar approach, we also searched for genes whose expression was impacted  
19 by CpG methylation. We restricted our analysis to DMRs located close to transcription  
20 start sites (TSS) of annotated genes showing at least a 20% change in methylation,  
21 associated to a 2fold variation in mRNA expression level (Fig 6B). Again, genes  
22 modified by DNA methylation in the  $R2^{\text{shp53-RAS}}$  cluster showed little overlap with those  
23 in  $R2^{\text{shp53-CCNE1}}/R2^{\text{shp53-WNT1}}$  HMECs (Hypergeometric test,  $p = 0.66$ , S7B Fig). In the  
24  $R2^{\text{shp53-RAS}}$  cluster, 17 genes were hypermethylated and underexpressed, 7 of which  
25 were key in cell-adhesion and the epithelial phenotype (*KRT5*, *ITGB4*, *DMKN*, *PKP3*,  
26 *ACP*, *PROM2*, *KDF1*). Interestingly, we identified 4 hypomethylated and overexpressed  
27 genes, of which 2 (*ITGBL1*, *FRMD4A*) corresponded to genes involved in cell invasion  
28 and metastasis [26,27]. In the  $R2^{\text{shp53-CCNE1}}/R2^{\text{shp53-WNT1}}$  HMECs, 16 genes all  
29 hypermethylated and downregulated were identified (Fig 6B). The most salient feature  
30 was the downregulation of genes related to cell invasion or EMT (*ANGPTL4*, *ITGB3*,  
31 *EHD3*, *FBN2*). Interestingly, the products of two of these genes, *ITGB3* and *EHD3*,  
32 interact physically in an activating regulatory loop.

33 Altogether, the RAS and the CCNE1/WNT1 transformed HMECs showed clear  
34 differences in genes whose expression was impacted by either CNAs or CpG  
35 methylation. The principal features in RAS HMECs were the repression of genes  
36 associated with the epithelial phenotype and cell adhesion and conversely the

1 activation of genes favoring cell invasion. In clear contrast, CCNE1/WNT1 HMECs  
2 showed a downregulation of EMT or invasion associated genes, combined with the  
3 activation of DNA repair and cell division genes. These results indicate the activation  
4 of distinct pathways in the respective sublines, with an opposite trend concerning cell  
5 phenotype, pro-mesenchymal in R2<sup>shp53-RAS</sup> and pro-epithelial in R2<sup>shp53-CCNE1</sup>/R2<sup>shp53-</sup>  
6 WNT1.

### 7 ***RAS HMECs and CCNE1/WNT1 HMECs resemble claudin-low and Basal-like*** 8 ***breast cancer, respectively***

9 We wanted to determine how much our HMEC models paralleled with human breast  
10 cancer. We first noted that the 16 HMEC models were classified as Basal-like breast  
11 cancer according to the CIT [9] or the BasalA/B [28] breast cancer classifiers (**S8A**  
12 **Fig**). Using a restricted Claudin-low classifier [29], R2<sup>shp53-RAS</sup> were classified as  
13 Claudin-low, R2<sup>shp53-CCNE1</sup> and R2<sup>shp53-WNT1</sup> as epithelial, while R2 and R2<sup>shp53</sup> formed an  
14 intermediate group, combining characteristics of both the Claudin-low and the  
15 epithelial group (**Fig 7A**). Next, we sought to compare the characteristics of our HMEC  
16 models with that of the Claudin-low and the Basal-like breast cancer subgroups in the  
17 human primary breast cancer METABRIC dataset. Restricting our analysis to *TP53*  
18 mutated and Basal-like tumors (defined with the PAM50 classifier), we selected 259  
19 tumors, which we stratified in Claudin-low/Basal-like (83) and Basal-like/Non-Claudin-  
20 low (176) subsets. We determined that tumors in this subgroup presented a  
21 significantly lower incidence of CNAs than the Basal-like/Non-Claudin-low (**Fig 7B-C**)  
22 and that the KRAS pathway was among the top activated pathways in the Claudin-  
23 low/Basal-like tumors (**S9A-B Fig**). In addition, *CCNE1* overexpression was  
24 significantly more frequent in the Basal-like/Non-Claudin-low than in the Claudin-low  
25 subgroup (**Fig 7D**). These data suggested that the differences in genomic profiles  
26 induced by distinct oncogenes observed in our HMEC models mimicked situations  
27 occurring in spontaneous human breast tumors: fewer genomic changes and elevated  
28 RAS in mesenchymal like claudin-low basal tumors, in comparison to non-claudin-low  
29 basal tumors which show frequent *CCNE1* overexpression and an epithelial phenotype.

30  
31

## 1 **Discussion**

2 Breast cancer can be broken down into 5 to 12 molecular subtypes on the basis of  
3 differences in mRNA expression and genetic anomaly profiles [9,10]. Although direct  
4 evidence is scarce, it is generally assumed that the origin of these molecular subtypes  
5 lies in cell lineage differences, where the original tumorigenic insult took place [8,9].  
6 To explain why premenopausal breast cancers are frequently of the triple negative  
7 type, whereas ER+ luminal type tumors are prevalent in post-menopausal patients, it  
8 has been proposed that the mammary gland undergoes an aging related cell lineage  
9 drift from the basal/myoepithelial to the luminal lineage which becomes predominant  
10 after menopause [30,31]. On the other hand, luminal progenitor cells have been  
11 shown to be at the origin of basal-like breast tumors in patients with constitutional  
12 *BRCA1* inactivation [32,33]. The fact that *BRCA1* mutations induced a differentiation  
13 shift from luminal progenitors towards a basal-like rather than a luminal phenotype  
14 helped explain this apparent contradiction [34]. Similarly, expression of an activated  
15 *PikcaH1047R* allele in committed unipotent luminal cells in mouse mammary glands  
16 induced cell fate reprogramming and emergence of basal like tumors [35]. These data  
17 are thus in favor of the idea that founding oncogenic mutations could impinge on  
18 tumor subtype in breast cancer. This is further supported by the work of Ben-David  
19 and coauthors (2016) [36] showing that, in genetically modified mouse mammary  
20 tumors, CNA profiles differed according to the driver mutation initiating the tumor.  
21 Using primary HMECs, which according to the classification proposed by Lim and  
22 coworkers (2009) [32] correspond to luminal progenitors (S8B Fig), we show here  
23 that cell transformation by way of distinct oncogenes resulted in different patterns of  
24 aberrations at both the CNA and DNA methylation levels. Most remarkably, HMECs  
25 transformed by RASv12 (R2<sup>shp53-RAS</sup>) presented clearly distinct patterns of genetic and  
26 epigenetic modifications compared to their R2<sup>shp53-CCNE1</sup> or R2<sup>shp53-WNT1</sup> counterparts.  
27 The latter two exhibited globally similar CNA and DNA methylation profiles, albeit  
28 some focal differences could be found.

29 In our model system, inactivation of the *TP53* gene was the initial step towards  
30 transformation. Given the role of *TP53* in keeping the integrity of the genome, onset  
31 of genetic instability in R2<sup>shp53</sup> HMECs was expectable. Surprisingly, no gross genomic  
32 anomalies, even after more than one year in culture, was observed. R2<sup>shp53</sup> rapidly  
33 became tetraploid upon inactivation of p53, in line with the critical role of p53 in  
34 ploidy control [37]. Tetraploidy is considered as a prelude to large scale chromosomal  
35 aberrations in cancer [38-40] and has been shown to confer rapid adaptation capacity  
36 in yeast [41]. We thus propose that while p53 inactivation did not provoke marked

1 genetic changes in our HMEC models, it favored genetic plasticity and laid the ground  
2 for further genetic rearrangements upon oncogene expression. This trend was  
3 illustrated by  $R2^{\text{shp53-CCNE1}}$  and  $R2^{\text{shp53-WNT1}}$ , which progressively became aneuploid and  
4 whose rearrangement levels increased significantly after soft agar cloning. In  
5 remarkable contrast,  $R2^{\text{shp53-RAS}}$  remained strictly tetraploid and did not acquire further  
6 anomalies after soft agar. This suggested ongoing genetic instability in  $R2^{\text{shp53-CCNE1}}$   
7 and  $R2^{\text{shp53-WNT1}}$  HMECs, whereas a stabilization took place in  $R2^{\text{shp53-RAS}}$ . This difference  
8 in genetic instability levels between the RAS and the CCNE1 or WNT1 transformed  
9 HMECs was further supported by the reduced number of  $\gamma\text{H2Ax}$  and 53BP1 foci in  
10  $R2^{\text{shp53-RAS}}$  compared to  $R2^{\text{shp53-CCNE1}}$  or  $R2^{\text{shp53-WNT1}}$ . These observations are in line with  
11 recent work showing that primary mammary epithelial cells or immortalized HME  
12 expressing high levels of *ZEB1* kept stable genomes upon transduction of RASv12  
13 [42]. In this model system, *ZEB1* was shown to control a ROS scavenging program  
14 that protected cells overexpressing RASv12 from DNA damage. The relative genetic  
15 stability of  $R2^{\text{shp53-RAS}}$  HMECs could be linked to the strong EMT, associated with the  
16 activation of *ZEB1*, that characterized these cells (Fig7A and S8B Fig). In contrast,  
17  $R2^{\text{shp53-CCNE1}}$  and  $R2^{\text{shp53-WNT1}}$  HMECs showed an epithelial phenotype and low levels of  
18 *ZEB1* expression.  $R2^{\text{shp53-RAS}}$  were classified Claudin-low, whereas  $R2^{\text{shp53-CCNE1}}$  and  
19  $R2^{\text{shp53-WNT1}}$  classified as Basal-like with epithelial dominance. Interestingly,  $R2^{\text{shp53}}$  cells  
20 formed an intermediary cluster combining epithelial and mesenchymal features (Fig  
21 7A). This suggested that the phenotypic switch (EMT for  $R2^{\text{shp53-RAS}}$  and MET for  
22  $R2^{\text{shp53-CCNE1}}$  and  $R2^{\text{shp53-WNT1}}$ ) occurred as a consequence of the ectopic expression of  
23 the respective oncogenes. Remarkably, the  $R2^{\text{shp53-RAS}}$  resembled Claudin-low breast  
24 cancer, whereas  $R2^{\text{shp53-CCNE1}}$  and  $R2^{\text{shp53-WNT1}}$  were analogous to basal-like breast  
25 tumors. As a matter of fact, Claudin-low breast tumors showed a lower level of CNAs  
26 and a frequent activation of the RAS pathway, whereas basal-like tumors presented  
27 higher CNA levels and elevated *CCNE1* expression. Although our HMEC models do not  
28 sum up the complete spectrum of human breast cancers, our data show that they  
29 mimic at least partially Basal-like and Claudin-low breast cancer.  
30 In this work, we inferred a chronology of the genetic changes that occurred at  
31 different steps of HMEC transformation. The first modified were miR and mRNA  
32 expression, followed closely by DNA methylation and CNAs occurred last. This  
33 indicated that expression changes acted as drivers, modified the phenotype and  
34 impacted on the epigenetic and genetic landscape that finally locked the changes. In  
35  $R2^{\text{shp53-RAS}}$  HMECs, a large number of genes that were modified by DNA methylation  
36 were involved in EMT, such as the repression of the epithelial genes *KRT5*, *ITGB4*,

1 *NUAK1*, *ACP5* and *PROM2*, concomitant to the hypomethylation and overexpression of  
2 the pro-invasive *ITGBL1* and *FRMD4A* genes. DNA methylation changes have been  
3 proposed as hallmarks of advanced stages of EMT [43]. Thus, epigenetic changes in  
4  $R2^{\text{shp53-RAS}}$  are in coherence with the deep shift towards a mesenchymal phenotype  
5 undergone by these cells. Interestingly, CNAs in  $R2^{\text{shp53-RAS}}$  impacted two actors of the  
6 NOTCH pathway, with *HEY1* being gained and overexpressed and *FBXW7* being lost  
7 and downregulated. *HEY1* is an important NOTCH target gene and *FBXW7* is a  
8 repressor of NOTCH [23]. Interestingly, *FBXW7* ubiquitination activity has been shown  
9 to be repressed by activated RAS [44]. Thus, the copy number reduction of *FBXW7*  
10 could be an adaptive response to RAS activation, resulting in the activation of the  
11 NOTCH pathway in  $R2^{\text{shp53-RAS}}$ . In  $R2^{\text{shp53-CCNE1}}/R2^{\text{shp53-WNT1}}$ . We noted hypermethylation  
12 and downregulation of the *ANGPTL4*, *ITGB3*, *EHD3* and *FBN2* genes, which have been  
13 associated to cell migration and invasion. Hence, in  $R2^{\text{shp53-CCNE1}}/R2^{\text{shp53-WNT1}}$  DNA  
14 methylation changes contributed to the mesenchymal to epithelial transition  
15 demonstrated by the mRNA expression changes. This trend was reinforced by CNAs,  
16 as shown by the loss and downregulation of *TGFBR2* and *CTNNB1*, indicating the  
17 downregulation of the TGF $\beta$  pathway in CCNE1 or WNT1 HMECs. The TGF $\beta$  pathway is  
18 a known promoter of EMT and its downregulation appeared in coherence with the  
19 epithelial phenotype of  $R2^{\text{shp53-CCNE1}}$  and  $R2^{\text{shp53-WNT1}}$  cells. Further notable consequence  
20 of CNAs in  $R2^{\text{shp53-CCNE1}}/R2^{\text{shp53-WNT1}}$  cells were the gain of the mitotic spindle assembly  
21 genes *NUMA1*, *CUX1* or mitosis and loss of *AKAP12* negative regulator of Polo Kinase.  
22 These anomalies could be associated to aneuploidy in these cells. Indeed, depletion of  
23 *AKAP12* has been shown to lead to aneuploidy and increased tumor growth [45] and  
24 overexpression of *NUMA1* and *CUX1* could represent adaptive responses to increasing  
25 chromosomal instability.

## 26 **Conclusions**

27 Altogether, data presented herein show that  $R2^{\text{shp53-RAS}}$  HMECs presented clearly  
28 different genomic and DNA methylation profiles relative to  $R2^{\text{shp53-CCNE1}}/R2^{\text{shp53-WNT1}}$ .  
29 The nature of the genes whose expression was modified either by DNA methylation or  
30 CNAs were consistent with the dominant pathways activated and reflected the  
31 phenotypes in the respective models, mesenchymal in  $R2^{\text{shp53-RAS}}$ , epithelial in  $R2^{\text{shp53-CCNE1}}/R2^{\text{shp53-WNT1}}$  (Fig 8).

33 Thus, our data strongly suggest that early activation of distinct oncogenic insults in a  
34 given cell type will not only impinge on the phenotypic characteristics of the resulting  
35 tumors, but also impact on their genomic and epigenetic landscapes and could  
36 contribute to the determination of cancer subtypes.



## 1 **Material and Methods**

### 2 ***HMEC models***

3 Human Mammary Epithelial Cells (HMECs) were isolated from mammary gland  
4 explants obtained from plastic surgical after informed consent from the patient. This  
5 work was approved by the Ethics committee of the University of Montpellier. Cell  
6 suspensions were produced by mechanical and enzymatic dissociation with 1%  
7 collagenase. After elimination of fibroblasts, HMECs were cultured at 37°C in 5% CO<sub>2</sub>,  
8 in conditioned MEBM medium supplemented with antibiotics (*MEGM single Quots*,  
9 Lonza, Levallois-Perret, France). Primary HMECs were transduced with amphotropic  
10 retroviral supernatants corresponding to: pSUPER.retro.hygro-shp53, pBABE.neo-  
11 CCNE1, pLNC-WNT1, pBABE.puro-HRASV12 followed by 3 weeks of antibiotic  
12 selection.

### 13 ***β-galactosidase senescence test***

14 β-galactosidase activity was assay by histochemistry using the *Senescence Cells*  
15 *Histochemical Staining* kit (Sigma-Aldrich, St Quentin Fallavier, France) following  
16 manufacturer's instructions. β-galactosidase positive cells were quantified under the  
17 microscope in duplicate on 400 cells minimum.

### 18 ***Telomeric restriction fragment (TRF) analysis and telomerase activity test*** 19 ***and chromosome counts***

20 TRF were purified using the *TeloTAGGG Telomere Length Assay* (Sigma-Aldrich, St  
21 Quentin Fallavier, France) following manufacturer's instructions. TRF sizes determined  
22 by 0.8% agarose gel electrophoresis and Southern blotting. The Nylon membrane was  
23 hybridized telomeric DNA probe labeled with digoxigenine and revealed with anti-DIG  
24 antibodies coupled alcalin phosphatase and chemiluminescence. Medium TRF size  
25 was calculated using  $TRF = \frac{\sum(OD_i)}{\sum(OD_i/L_i)}$  (OD<sub>i</sub>= optical density at i, L<sub>i</sub>= size at i)  
26 Telomerase activity was measured on 2x10<sup>5</sup> cells with the *TeloTAGGG Telomerase*  
27 *PCR ELISA* kit (Sigma-Aldrich, St Quentin Fallavier, France) following manufacturer's  
28 instructions.

### 29 ***Anchorage independence growth (AIG)***

30 AIG was determined in 6 well plates containing 2 layers of low melting point agarose  
31 in MEBM (Lonza) at 0.75% and 0.45% on top. 15000 cells/well were seeded and  
32 plates incubated for 5 weeks at 37°C in 5% CO<sub>2</sub>. Colonies were visualized using  
33 0.01% cristal violet and counted. Prior staining colonies were isolated and put in  
34 culture to generate the Soft Agar (SA) clones.

## 1 ***Tumorigenicity***

2 1.5 or  $5 \times 10^6$  cells resuspended in a 1:1 Matrigel/PBS solution were injected  
3 subcutaneously in Swiss nude or SCID beige mice (Harlan/Envigo, Garnat France).  
4 Tumor growth was monitored for 5 months before animals were sacrificed. In vivo  
5 experiments were systematically reviewed and approved by an internal animal ethics  
6 committee and the University of Montpellier animal ethics committee.

## 7 ***DNA and RNA extraction***

8 DNA and RNA were isolated using the QIAmp DNA Mini kit and Rneasy Mini Kit  
9 (Qiagen S.A. France, Courtaboeuf, France). Each DNA sample was quantified by  
10 nanospectrophotometry (NanoView, GE Healthcare, Orsay, France) and qualified by  
11 0.8% agarose electrophoresis. Qualification of mRNA was performed using a  
12 Bioanalyser (Agilent, Santa Clara, CA, USA).

## 13 ***Array-CGH and mRNA expression profiling***

14 Array-CGH was done using HG18 CGH 385K Whole Genome v2.0 array (Roche  
15 NimbleGen, Madison, WI, USA). DNA from a pool of 20 normal females was used as  
16 reference. For hybridization, 1 mg of genomic DNA and reference DNA were labeled  
17 using NimbleGen Dual-Color DNA Labeling Kit (Roche Diagnostics, Meylan, France).  
18 Labeling products were precipitated with isopropanol and resuspended in water. Test  
19 (Cy3) and reference (Cy5) samples were combined in 40 ml of NimbleGen  
20 Hybridization buffer. Hybridization was performed in a NimbleGen Hybridization  
21 system 4 for 48 h at 42 C with agitation mode B and washed using NimbleGen Wash  
22 Buffer kit according to manufacturer's instructions. Arrays were scanned at 5 mm  
23 resolution using the GenePix4000B scanner (Axon Instruments, Molecular Devices  
24 Corp., Sunnyvale, CA). Data were extracted from scanned images using NimbleScan  
25 2.5 extraction software (Roche NimbleGen, Madison, WI, USA), which allows  
26 automated grid alignment, extraction, normalization, and export of data files.  
27 Normalized files were used as input for the Nexus 6.1 Software (Biodiscovery, El  
28 Segundo, CA, USA). Analysis settings for data segmentation and calling were the  
29 following: significant threshold for FASTST2 Segmentation algorithm:  $1.0 \times 10^{-7}$ , Max  
30 Continuous Probe Spacing: 1000, Min number of probes per segment: 10, high level  
31 gain: 0.485, gain: 0.17, loss: 0.2, homozygous copy loss: 0.485. Hierarchical  
32 clustering was done using Nexus 6.1 using average linkage setting. Interval files from  
33 each of the 18 samples were exported and converted to a BedGraph format and  
34 merged (using the Merge BedGraph files tool (v 0.1.1, <http://galaxy.sb-roscoff.fr>) in

1 order to define common interval between samples. Intervals smaller than 2 MB were  
2 removed resulting in a set of 268 intervals with CNA changes in at least one sample.  
3 This file was used as input of the MoCluster algorithm.

#### 4 ***miR expression profiling***

5 Biotinylated cRNA were prepared according to the Affymetrix IVT Express protocol  
6 from 100 or 200 ng total RNA and hybridization was done as follows. CRNA were  
7 fragmented, 12 mg hybridized for 16 h at 45 C, washed and stained in the Affymetrix  
8 Fluidics Station 450 with Hybridization Wash & Stain kit. GeneChips were scanned  
9 using the Affymetrix GeneChip Scanner 3000 7G. Raw feature data were normalized  
10 using Robust Multi-array Average (RMA) method (R package affy). All subsequent  
11 analyses were performed on normalized datasets. To determine genes differentially  
12 expressed between sublines we used sam\_multiclass command with one class for two  
13 biological duplicates (samr R package median). Lines containing identical GeneSymbol  
14 were collapsed with a max function. This file containing expression values for 18  
15 samples and 2063 genes was used as input in MoCluster.

#### 16 ***DNA methylation profiling***

17 RRBS libraries were prepared as previously described [47]. Genomic DNA was  
18 digested for 5 h with MspI (Thermo Scientific) followed by end-repair, A- tailing (with  
19 Klenow fragment, Thermo Scientific) and ligation to paired-end methylated adapters  
20 (with T4 DNA ligase, Thermo Scientific) in Tango 1X buffer. We purified fragments in  
21 the range 150 to 400 bp by electrophoresis on a 3% (w/v) agarose 0.5X TBE gel with  
22 the MinElute gel extraction kit (Qiagen), and performed two rounds of bisulfite  
23 conversion with the EpiTect kit (Qiagen). RRBS libraries were generated with PfUTurbo  
24 Cx hotstart DNA polymerase (Agilent) and indexed PE Illumina primers using the  
25 following PCR conditions: 95°C for 2 minutes, 12 to 15 cycles (95°C for 30 s, 65°C for  
26 30 s, 72°C for 45 s), 72°C for 7 minutes. The libraries were purified with AMPure  
27 magnetic beads (Beckman Coulter) and sequenced (2 × 75 bp) on an Illumina  
28 HiSeq2000 by Integragen SA (Evry, France) to generate between 20 and 30 million  
29 pairs of reads per sample. The processing of reads was performed as described  
30 (Auclair et al, 2014). We aligned reads to the human genome (hg19) with BSMAP and  
31 only retained the CpGs sequenced at least 8X.

32 Determination of Differentially methylated regions (DMRs) between sublines was  
33 restricted to CGI comprising at least 5 contiguous CpGs, filtered for methylation

1 differences of at least 0.2 between any of the samples. The frequency of the  
2 methylation levels was calculated and displayed as histogram in 40 classes to  
3 evaluate whole genomic variation of the DNA methylation (figure 3A). Then we used  
4 `sam_multiclass` function (`samr` R package median FDR= 0.0449). The result was a  
5 file of 892 DNA segments that was used as an input for MoCluster. Accordingly, we  
6 explored global DNA methylation variation genome-wide. In the expression correlation  
7 analysis we selected DMRs close to TSS (+/- 1000 bp to TSS).

## 8 **MoGSA**

9 To integrate the omics data of different origins (CNA, mIR and Mrna and DNA  
10 Methylation), we used the MoGSA package (Meng, 2017a,b) to identify Joint Patterns  
11 Across Multiple Omics Data Sets. Mogsas have proved to be particularly efficient in  
12 term of computational time and compared favorably to `icluster` (Meng et al., 2016).  
13 We used consensus PCA from the MoGSA R package and displayed the results from  
14 the first and second principal component either for each omic dataset (CGH, DNA,  
15 mRNA or miR) or all together. The features with highest coefficient in the definition of  
16 the first axis of the PCA were selected and submitted to unsupervised Ward clustering  
17 and presented as heatmaps. Features varied according to the analysis and were as  
18 follows; Coefficient higher or equal to 0.07 in Fig 2C, coefficient higher or equal to  
19 0.05 in Fig 3C, coefficient higher or equal to 0.07 in Fig 4b, coefficient higher or equal  
20 to 0.06 in Fig 4D.

## 21 **Immunofluorescence**

22 Cells were seeded onto glass slides and grown to reach 50-60% confluence. Prior  
23 immunofluorescence cells were fixed with either 2% paraformaldéhyde or with ice cold  
24 methanol and permeabilized with 1% PBS-Triton and rinsed with 2% serum-PBS  
25 before incubation with the primary antibody, being rinsed in 2% serum-PBS and  
26 stained with DAPI and incubated with the secondary antibody.  $\gamma$ H2AX/53BP1 foci were  
27 counted in triplicate on 400 nuclei. Antibodies are listed in the S Appendix.

## 28 **High throughput data analysis**

29 Detailed methods are presented in the Supplementary Methods. Raw array and RRBS  
30 data can be accessed at GSE114849 (see S Appendix).

## 31 **Figure Legend:**

32  
33 **Fig 1: Stepwise transformation HMEC models.** A: experimental scheme of the  
34 subline production. B: percentage of B-galactosidase positive cells in the different

1 HMEC variants. C: mean length of telomeres estimated by Southern blotting show a  
2 stabilization of telomere length in R2<sup>shp53.Late</sup> and transformed HMECs. D: fraction of  
3 the genome involved in Copy Number Alterations. Anova Multiple Comparisons test  
4 showed significant increase in genomic fraction involved in CNA between R2 primary  
5 HMEC and oncogene transduced sublines (R2 vs. R2.shP53-Ras p=0.0149; R2 vs.  
6 R2.shP53-CCNE1 and shp53-WNT1 p=0.0193). Comparison of pretransformed and  
7 transformed ( after Soft Agar) sublines showed that genomic fraction involved in CNA  
8 were significantly increased in shp53-CCNE1.SA and shp53-WNT1.SA cells (shP53-  
9 CCNE1/shp53-WNT1 vs. R2.shP53-CCNE1.SA/shp53-WNT1.SA p= 0.0021) but not in  
10 shp53-RAS.SA cells (shP53-Ras vs. shP53-Ras.SA p= 0.9835). E: chromosome  
11 numbers were estimated on chromosome spreads. At least 50 karyotypes were scored  
12 in each subline.

13 **Fig 2:** A. Joint PCA analysis including CNA, DNA methylation, miR and mRNA data B.  
14 Non supervised hierarchical clustering (Ward) on PC1 and PC2 segregating in three  
15 clusters (red line threshold).

16 **Fig 3: Copy Number Alterations profiles vary according to the oncogene**

17 **expressed.** Copy Number Change analyses were performed on HG18 CGH 385K  
18 Whole Genome v2.0 array. Regions of gain or loss were determined using the Nexus  
19 7.5 Software and intervals of at least 2 Mb. **A:** PCA analysis of the CNAs. **B:** Ward  
20 clustering of the CNAs defining PC1 in the PCA analysis, color code of the heatmap is  
21 blue for loss, red for gain.

22 **Fig 4: CpG methylation profiles show coordinated variation according to the**  
23 **oncogene expressed.** **A.** density histograms of RRBS methylation scores at CpGs  
24 sites (at least 5 contiguous CG) genome wide in primary R2 HMECs, shp53.Early,  
25 shp53.Late, shp53-CCNE1, shp53-CCNE1.SA (Soft Agar), shp53-WNT1, shp53-  
26 WNT1.SA, shp53-RAS, shp53-RAS.SA. **B.** PCA analysis of the most significantly  
27 varying DMRs. **C;** Ward clustering of the DMRs (without constraint concerning their  
28 location) defining PC1 in the PCA analysis, color code of the heatmap is red for  
29 hypermethylation, blue for hypomethylation.

30 **Fig 5: miR and mRNA expression profiles of the shp53-RAS show clear**

31 **differences compared with shp53-CCNE1 and shp53-WNT1 sublines.** A: PCA  
32 analysis of the most significantly varying miR. B: Ward clustering of the miR defining  
33 PC1 in the PCA analysis, color code of the heatmap is red for overexpression, blue for  
34 underexpression. C: PCA analysis of the most significantly varying mRNA. D: Ward  
35 clustering of the miR defining PC1 in the PCA analysis, color code of the heatmap is  
36 red for overexpression, blue for underexpression.

1 **Fig 6: Most significant gene expression differences due to copy number**  
2 **alterations (A) and differential methylation (B) in R2<sup>shp53-RAS</sup> and R2<sup>shp53-</sup>**  
3 **CCNE1/R2<sup>shp53-WNT1</sup> HMECs.** Expression difference levels (Exp diff column) were  
4 calculated relative to expression levels in the R2 and R2<sup>shp53</sup> cluster and expressed in  
5 log2 scale. Genes are listed for each cluster (RAS for R2<sup>shp53-RAS</sup>, C/W for R2<sup>shp53-</sup>  
6 CCNE1/R2<sup>shp53-WNT1</sup>). **A.** Genes modified as a consequence of CNA have been selected  
7 from a broader list on the basis of their assignment either as cancer or tumor  
8 suppressor genes (assembled under the cancer gene category) or as members of the  
9 RAS pathway. Highlighted in red, genes overexpressed in regions of gain (Gain/OE),  
10 in blue, genes underexpressed in regions of loss (Loss/UE). **B.** Genes modified as a  
11 consequence of differential methylation at the transcription start sites (TSS). In red,  
12 genes hypomethylated with increased expression (Hypo/OE), in blue, genes  
13 hypermethylated with reduced expression (Hyper/UE).

14 **Fig 7: The different HMEC models resemble basal breast cancers and show**  
15 **varying levels of mesenchymal traits. A:** clustering analysis using a 28 gene  
16 signature representative of claudin low tumors. R2shp53-RAS models classified as  
17 strict claudin-low (mesenchymal), whereas R2shp53-CCNE1 and R2shp53-WNT1 were  
18 strictly epithelial. Of note, R2 (Ctrl here) and R2shp53 presented intermediate profiles  
19 combining elevated expression of both epithelial and mesenchymal genes. **B-C:**  
20 CCNE1/WNT1 and RAS HMECs resemble respectively Basal-like and claudin-low breast  
21 cancers which show similar differences in CNA numbers. **D:** differences in CCNE1  
22 mRNA expression levels. This analysis was done on 259 Basal-like tumors (PAM 50  
23 classification) selected from the Metabric dataset which were split in Basal-Like/Non  
24 claudin (176) and Claudin-low (83).

25 **Fig 8: Genetic, epigenetic and phenotypic modifications resulting from the**  
26 **transduction of distinct oncogenes in HMEC.** The changes occurring are depicted  
27 at different steps starting from primary HMEC and ending at transformed cells isolated  
28 from soft agar colonies. For readability purposes, only principal events and genes are  
29 presented. Arrows indicate upregulation or downregulation of expression of genes  
30 modified by CNAs or differential methylation at their TSS, as well as up or  
31 downregulation of pathways as part of the phenotypic consequences of the activation  
32 of the respective oncogenes.

33  
34 **Supporting information**

35 **S1 Fig: Gradual immortalization and transformation of the shp53 HMEC**  
36 **sublines.** A, b-galactosidase staining; B, C: HTERT mRNA expression and telomerase  
37 enzymatic activity, the shp53 HTERT cells are presented as a positive control of TERT

1 expression; D: anchorage independent growth in soft agar, number of positive  
2 experiments out of number of attempts, pictures of the corresponding soft agar petri  
3 dish and blow up of foci formed by the respective sublines.  
4

5 **S2 Fig: Attenuation of p53 after shRNA transduction and overexpression of**  
6 **oncogenes in oncogene transduced sublines.** A: attenuation of p53 was  
7 ascertained by challenging primary R2 and R2-shp53 cells with Bleomycin for 6 hours,  
8 accumulation of p53 and induction of p21 were used as read outs for p53  
9 functionality. B: QPCR verification of WNT1, CCNE1 and RAS mRNA expression in R2-  
10 shp53-WNT1, R2-shp53-CCNE1 and R2-shp53-RAS respectively. C: protein expression  
11 levels by western blotting. E: early; L: late.  
12

13 **S3 Fig: Spontaneous DNA damage in shp53 sublines.** A: gammaH2Ax and 53BP1  
14 staining patterns, note the pannuclear H2Ax staining in shp53 HMECs, whereas  
15 shp53-WNT1, shp53-CCNE1 and shp53-RAS show predominantly H2Ax foci.  
16 Hydroxyurea treatment was used as a control of H2Ax staining as a condition of  
17 severe replication stress. It is of note that primary R2 HMEC presented a sizeable  
18 number of foci positive cells, which can be attributed to telomere attrition in these  
19 cells. Bleomycine treatment was used as a control of double strand breaks. B: fraction  
20 of cells showing H2Ax pan-nuclear staining or more than 4 foci. C: Statistics of  
21 Neutral CometAssay tail moment measurement for 3 independent experiments in  
22 shP53 and shp53-oncogene sublines (top table) and Annova multiple comparison test  
23 (bottom table). shP53-CCNE1 and shP53-WNT1 sublines present a significantly higher  
24 number of double strand breaks than shP53-RAS. D: Tail moment measurements box  
25 plot.  
26

27 **S4 Fig: CNA plots of HMEC models.** A: CNA at different steps of transformation.  
28 CNAs are represented for each chromosome, red for losses, blue for gains. The hight  
29 of the bars indicates the probability of occurrence. B: cumulated CNA plots of HMEC  
30 models. CNAs are represented for each chromosome, red for losses, blue for gains.  
31 The hight of the bars indicates the amplitude of the copy number change.  
32

33 **S5 Fig: pathways and regulation networks principally affected in the different**  
34 **HMEC sublines.**  
35

36 **S6 Fig: phenotypic characteristics of shp53 HMEC sublines.** Cells were stained  
37 by immunofluorescence (IF) for the expression of ECAD (E-Cadherin, green) which is  
38 a marker of epithelial cells, VIM (Vimentin, red) marker of mesenchymal cells, CK8  
39 (Cytokeratin 8) marker of luminal breast epithelial cells, CK5 (Cytokeratin 5) marker  
40 of basal breast epithelial cells. Differential expression patterns can be observed  
41 according to the genetic elements expressed and the stage of the culture. Normal  
42 HMEC and Early shp53 co-express ECAD and VIM and are mosaiec for CK5 and CK8  
43 expression. In shp53 late HMEC tended to lose ECAD expression and become  
44 mesenchymal, but kept a mosaic CK5/CK8 pattern. In shp53-WNT1 and shp53-CCNE1  
45 ECAD and VIM were co-expressed in all cells indicating the conservation of an  
46 epithelial phenotype. Interestingly, whereas shp53-WNT1 expressed only CK5 and no  
47 CK8, shp53-CCNE1 preserved the original mosaic phenotype of the shp53 HMECs.  
48 Expression of RAS-v12 produced drastic changes as illustrated by the concomitant  
49 loss of expression of ECAD and both CK5 and CK8.  
50

51 **S7 Fig: Genes modified by CNA or differential methylation in R2<sup>shp53-RAS</sup> and**  
52 **R2<sup>shp53-CCNE1</sup> / R2<sup>shp53-WNT1</sup> show little overlap.** Of note MTUS1 is strongly  
53 underexpressed in RAS (-2,95; about 1/10 x) whereas it is overexpressed in CW  
54 (0,87, about 1,8 x). PLAG1 is strongly overexpressed in RAS (3,25; about 9,5 X) and

1 moderately in CW (0,84 about 1,8 x) similarly to THRA (RAS change =1,89 about 3,7x;  
2 CW change =0,89 about 1,85x). ZNF7 expression change is equivalent in both  
3 clusters.  
4

5 **S8 Fig: HMEC models show variable association to either the Basal A or Basal**  
6 **B subtype.** A: Classification was done using the BasalA/B classification the gene  
7 centroid list

8 <http://rock.icr.ac.uk/collaborations/Mackay/centroid.correlations.Eset/ExpressionSetNearestCentroidCorrelations.pdf>) (Neve et al., 2006) and spearman correlation. R2  
9 (Ctrl here) and R2shp53 showed co-correlation with Basal A and Basal B. R2shp53-  
10 RAS models showed strongly positive correlation to Basal B and negative correlation  
11 to Basal A, whereas R2shp53-CCNE1 and R2shp53-WNT1 showed stronger correlation  
12 to Basal A. B: radar plot of the mammary differentiation scores as defined by E. Lim  
13 et al (2009) of our HMEC models. The different HMEC sublines presented a high  
14 luminal progenitor and luminal mature score with little variation among samples. Of  
15 note the elevated stromal score of shp53-RAS HMECs and the globally marginal MaSC  
16 score.  
17

18  
19 **S9 Fig:** Principal pathways activated in claudin-low TNBC  
20

21 **S1A Table: genes with copy number dependent expression changes in the**  
22 **shp53-ras cluster vs. The shp53 and R2 cluster.** Genes were selected after a  
23 Spearman correlation test on the complete dataset and 90 genes from this  
24 comparison corresponded to genes with log2 scale changes (copy number change <-  
25 0.15 or > 0.15; expression change <-0.5 or expression change >0.5; uncorrected t-  
26 test for expression data <0.05)  
27

28 **S1B Table: genes with copy number dependent expression changes in the**  
29 **shp53-ccne/wnt cluster vs. The shp53 and R2 cluster.** Genes were selected  
30 after a Spearman correlation test on the complete dataset and 156 genes from this  
31 comparison corresponded to genes with log2 scale changes (copy number change <-  
32 0.15 or > 0.15; expression change <-0.5 or expression change >0.5; uncorrected t-  
33 test for expression data <0.05).  
34

35 **Acknowledgments:** Authors wish to thank Anne Morel and Laurent Le Cam for  
36 providing retroviral constructs used in this project and Alexandre Djiane for critical  
37 reading. The expert input of the personnel of the microarray Center of the Genomics  
38 Research Unit Luxembourg Institute of Health is gratefully acknowledged.

39 **Authors contribution**

40 CF, AS, AAK: cell and molecular biology, retroviral transductions, biochemistry. BO:  
41 array-CGH and data analysis. ES, JC: biomathematical analyses of gene expression  
42 data. EC, AB, MD, MW: RBBS libraries and DNA methylation data production. WJ, CS:  
43 helped design and edited the manuscript. SdM: designed and performed  
44 bioinformatics and biomathematical analyses, edited the manuscript. CT: Study  
45 design and coordination, fund raising, manuscript preparation and writing.



## 1 **References**

- 2 1. Chin K, de Solorzano CO, Knowles D, Jones A, Chou W, Rodriguez EG, et al. In situ analyses  
3 of genome instability in breast cancer. *2004*;36:984–8.
- 4 2. Stratton MR, Campbell PJ, Futreal PA. The cancer genome. *2009*;458:719–24.
- 5 3. Jones S, Wang T-L, Shih I-M, Mao T-L, Nakayama K, Roden R, et al. Frequent mutations of  
6 chromatin remodeling gene ARID1A in ovarian clear cell carcinoma. *Science*. *2010*;330:228–31.
- 7 4. Feinberg AP, Tycko B. The history of cancer epigenetics. *Nat Rev Cancer*. *2004*;4:143–53.
- 8 5. Jones PA, Baylin SB. The epigenomics of cancer. *Cell*. *2007*;128:683–92.
- 9 6. Ciriello G, Miller ML, Aksoy BA, Senbabaoglu Y, Schultz N, Sander C. Emerging landscape of  
10 oncogenic signatures across human cancers. *Nature Publishing Group*; *2013*;45:1127–33.
- 11 7. Sack LM, Davoli T, Li MZ, Li Y, Xu Q, Naxerova K, et al. Profound Tissue Specificity in  
12 Proliferation Control Underlies Cancer Drivers and Aneuploidy Patterns. *Cell*. Elsevier Inc;  
13 *2018*;:1–40.
- 14 8. Prat A, Perou CM. Deconstructing the molecular portraits of breast cancer. *Molecular Oncology*.  
15 Elsevier B.V; *2011*;5:5–23.
- 16 9. Guedj M, Marisa L, de Reynies A, Orsetti B, Schiappa R, Bibeau F, et al. A refined molecular  
17 taxonomy of breast cancer. *Oncogene*. *2011*.
- 18 10. Curtis C, Shah SP, Chin S-F, Turashvili G, Rueda OM, Dunning MJ, et al. The genomic and  
19 transcriptomic architecture of 2,000 breast tumours reveals novel subgroups. *Nature*.  
20 *2012*;486:346–52.
- 21 11. Holm K, Hegardt C, Staaf J, Vallon-Christersson J, Jönsson G, Olsson H, et al. Molecular  
22 subtypes of breast cancer are associated with characteristic DNA methylation patterns. *Breast*  
23 *Cancer Res*. *2010*;12:R36.
- 24 12. van Beers EH, van Welsem T, Wessels LFA, Li Y, Oldenburg RA, Devilee P, et al.  
25 Comparative genomic hybridization profiles in human BRCA1 and BRCA2 breast tumors highlight  
26 differential sets of genomic aberrations. *Cancer Res*. *2005*;65:822–7.
- 27 13. Smolen GA, Muir B, Mohapatra G, Barmettler A, Kim WJ, Rivera MN, et al. Frequent met  
28 oncogene amplification in a Brca1/Trp53 mouse model of mammary tumorigenesis. *Cancer Res*.  
29 *2006*;66:3452–5.
- 30 14. Gazin C, Wajapeyee N, Gobeil S, Virbasius C-M, Green MR. An elaborate pathway required  
31 for Ras-mediated epigenetic silencing. *2007*;449:1073–7.
- 32 15. Holstege H, van Beers E, Velds A, Liu X, Joosse SA, Klarenbeek S, et al. Cross-species  
33 comparison of aCGH data from mouse and human BRCA1- and BRCA2-mutated breast cancers.  
34 *BMC Cancer*. *2010*;10:455.
- 35 16. Wajapeyee N, Malonia SK, Palakurthy RK, Green MR. Oncogenic RAS directs silencing of  
36 tumor suppressor genes through ordered recruitment of transcriptional repressors. *Genes &*  
37 *Development*. *2013*;27:2221–6.
- 38 17. Fang M, Ou J, Hutchinson L, Green MR. The BRAF oncoprotein functions through the  
39 transcriptional repressor MAFG to mediate the CpG Island Methylator phenotype. *Molecular Cell*.

- 1 2014;55:904–15.
- 2 18. Toledo LI, Murga M, Zur R, Soria R, Rodriguez A, Martinez S, et al. A cell-based screen  
3 identifies ATR inhibitors with synthetic lethal properties for cancer-associated mutations. *Nat Struct*  
4 *Mol Biol.* Nature Publishing Group; 2011;18:721–7.
- 5 19. Meng C, Helm D, Frejno M, Kuster B. moCluster: Identifying Joint Patterns Across Multiple  
6 Omics Data Sets. *J. Proteome Res.* 2016;15:755–65.
- 7 20. Brabletz S, Brabletz T. The ZEB/miR-200 feedback loop—a motor of cellular plasticity in  
8 development and cancer? *EMBO Rep.* 2010;11:670–7.
- 9 21. Kent OA, McCall MN, Cornish TC, Halushka MK. Lessons from miR-143/145: the importance  
10 of cell-type localization of miRNAs. *Nucleic Acids Res.* 2014;42:7528–38.
- 11 22. Nikolsky Y, Sviridov E, Yao J, Dosymbekov D, Ustyansky V, Kaznacheev V, et al. Genome-  
12 wide functional synergy between amplified and mutated genes in human breast cancer. *Cancer*  
13 *Res.* 2008;68:9532–40.
- 14 23. Welcker M, Clurman BE. FBW7 ubiquitin ligase: a tumour suppressor at the crossroads of cell  
15 division, growth and differentiation. *Nat Rev Cancer.* 2008;8:83–93.
- 16 24. Bailey CM, Khalkhali-Ellis Z, Seftor EA, Hendrix MJC. Biological functions of maspin. *J. Cell.*  
17 *Physiol.* 2006;209:617–24.
- 18 25. Huynh J, Etemadi N, Hollande F, Ernst M, Buchert M. The JAK/STAT3 axis: A comprehensive  
19 drug target for solid malignancies. *Semin. Cancer Biol.* 2017;45:13–22.
- 20 26. Li XQ, Du X, Li DM, Kong PZ, Sun Y, Liu PF, et al. ITGBL1 Is a Runx2 Transcriptional Target  
21 and Promotes Breast Cancer Bone Metastasis by Activating the TGF Signaling Pathway. *Cancer*  
22 *Res.* 2015;75:3302–13.
- 23 27. Goldie SJ, Mulder KW, Tan DWM, Lyons SK, Sims AH, Watt FM. FRMD4A Upregulation in  
24 Human Squamous Cell Carcinoma Promotes Tumor Growth and Metastasis and Is Associated  
25 with Poor Prognosis. *Cancer Res.* 2012;72:3424–36.
- 26 28. Neve RM, Chin K, Fridlyand J, Yeh J, Baehner FL, Fevr T, et al. A collection of breast cancer  
27 cell lines for the study of functionally distinct cancer subtypes. *Cancer Cell.* 2006;10:515–27.
- 28 29. Morel A-P, Hinkal GW, Thomas C, Fauvet F, Courtois-Cox S, Wierinckx A, et al. EMT inducers  
29 catalyze malignant transformation of mammary epithelial cells and drive tumorigenesis towards  
30 claudin-low tumors in transgenic mice. *PLoS Genet.* 2012;8:e1002723.
- 31 30. Garbe JC, Pepin F, Pelissier FA, Sputova K, Fridriksdottir AJ, Guo DE, et al. Accumulation of  
32 multipotent progenitors with a basal differentiation bias during aging of human mammary epithelia.  
33 *Cancer Res.* 2012;72:3687–701.
- 34 31. Lee JK, Garbe JC, Vrba L, Miyano M, Futscher BW, Stampfer MR, et al. Age and the means of  
35 bypassing stasis influence the intrinsic subtype of immortalized human mammary epithelial cells.  
36 *Front. Cell Dev. Biol. Frontiers;* 2015;3.
- 37 32. Lim E, Vaillant F, Wu D, Forrest NC, Pal B, Hart AH, et al. Aberrant luminal progenitors as the  
38 candidate target population for basal tumor development in BRCA1 mutation carriers. *Nat Med.*  
39 2009;15:907–13.
- 40 33. Molyneux G, Geyer FC, Magnay F-A, McCarthy A, Kendrick H, Natrajan R, et al. BRCA1

- 1 basal-like breast cancers originate from luminal epithelial progenitors and not from basal stem  
2 cells. *Cell Stem Cell*. 2010;7:403–17.
- 3 34. Proia TA, Keller PJ, Gupta PB, Klebba I, Jones AD, Sedic M, et al. Genetic predisposition  
4 directs breast cancer phenotype by dictating progenitor cell fate. *Cell Stem Cell*. 2011;8:149–63.
- 5 35. Van Keymeulen A, Lee MY, Ousset M, Brohée S, Rorive S, Giraddi RR, et al. Reactivation of  
6 multipotency by oncogenic PIK3CA induces breast tumour heterogeneity. *Nature Research*;  
7 2015;525:119–23.
- 8 36. Ben-David U, Ha G, Khadka P, Jin X, Wong B, Franke L, et al. The landscape of chromosomal  
9 aberrations in breast cancer mouse models reveals driver-specific routes to tumorigenesis. *Nat*  
10 *Comms*. 2016;7:12160.
- 11 37. Aylon Y, Oren M. p53: guardian of ploidy. *Molecular Oncology*. 2011;5:315–23.
- 12 38. Kuznetsova AY, Seget K, Moeller GK, de Pagter MS, de Roos JADM, Dürrbaum M, et al.  
13 Chromosomal instability, tolerance of mitotic errors and multidrug resistance are promoted by  
14 tetraploidization in human cells. *Cell Cycle*. 2015;14:2810–20.
- 15 39. Fujiwara T, Bandi M, Nitta M, Ivanova EV, Bronson RT, Pellman D. Cytokinesis failure  
16 generating tetraploids promotes tumorigenesis in p53-null cells. *Nature*. 2005;437:1043–7.
- 17 40. Zack TI, Schumacher SE, Carter SL, Cherniack AD, Saksena G, Tabak B, et al. Pan-cancer  
18 patterns of somatic copy number alteration. *Nat. Genet*. 2013;45:1134–40.
- 19 41. Selmecki AM, Maruvka YE, Richmond PA, Guillet M, Shoreh N, Sorenson AL, et al.  
20 Polyploidy can drive rapid adaptation in yeast. *Nature*. 2015;519:349–52.
- 21 42. Morel A-P, Ginestier C, Pommier RM, Cabaud O, Ruiz E, Wicinski J, et al. A stemness-related  
22 ZEB1-MSRB3 axis governs cellular pliancy and breast cancer genome stability. *Nat Med*.  
23 2017;23:568–78.
- 24 43. Tam WL, Weinberg RA. The epigenetics of epithelial-mesenchymal plasticity in cancer. *Nat*  
25 *Med*. 2013;19:1438–49.
- 26 44. Minella AC, Welcker M, Clurman BE. Ras activity regulates cyclin E degradation by the Fbw7  
27 pathway. *Proc Natl Acad Sci USA*. 2005;102:9649–54.
- 28 45. Canton DA, Keene CD, Swinney K, Langeberg LK, Nguyen V, Pelletier L, et al. Gravin Is a  
29 Transitory Effector of Polo-like Kinase 1 during Cell Division. *Molecular Cell*. 2012;48:547–59.
- 30 46. Manoir du S, Orsetti B, Bras-Gonçalves R, Nguyen T-T, Lasorsa L, Boissière F, et al. Breast  
31 tumor PDXs are genetically plastic and correspond to a subset of aggressive cancers prone to  
32 relapse. *Molecular Oncology*. 2014;8:431–43.
- 33 47. Auclair G, Guibert S, Bender A, Weber M. Ontogeny of CpG island methylation and specificity  
34 of DNMT3 methyltransferases during embryonic development in the mouse. *Genome Biol*.  
35 2014;15:490.

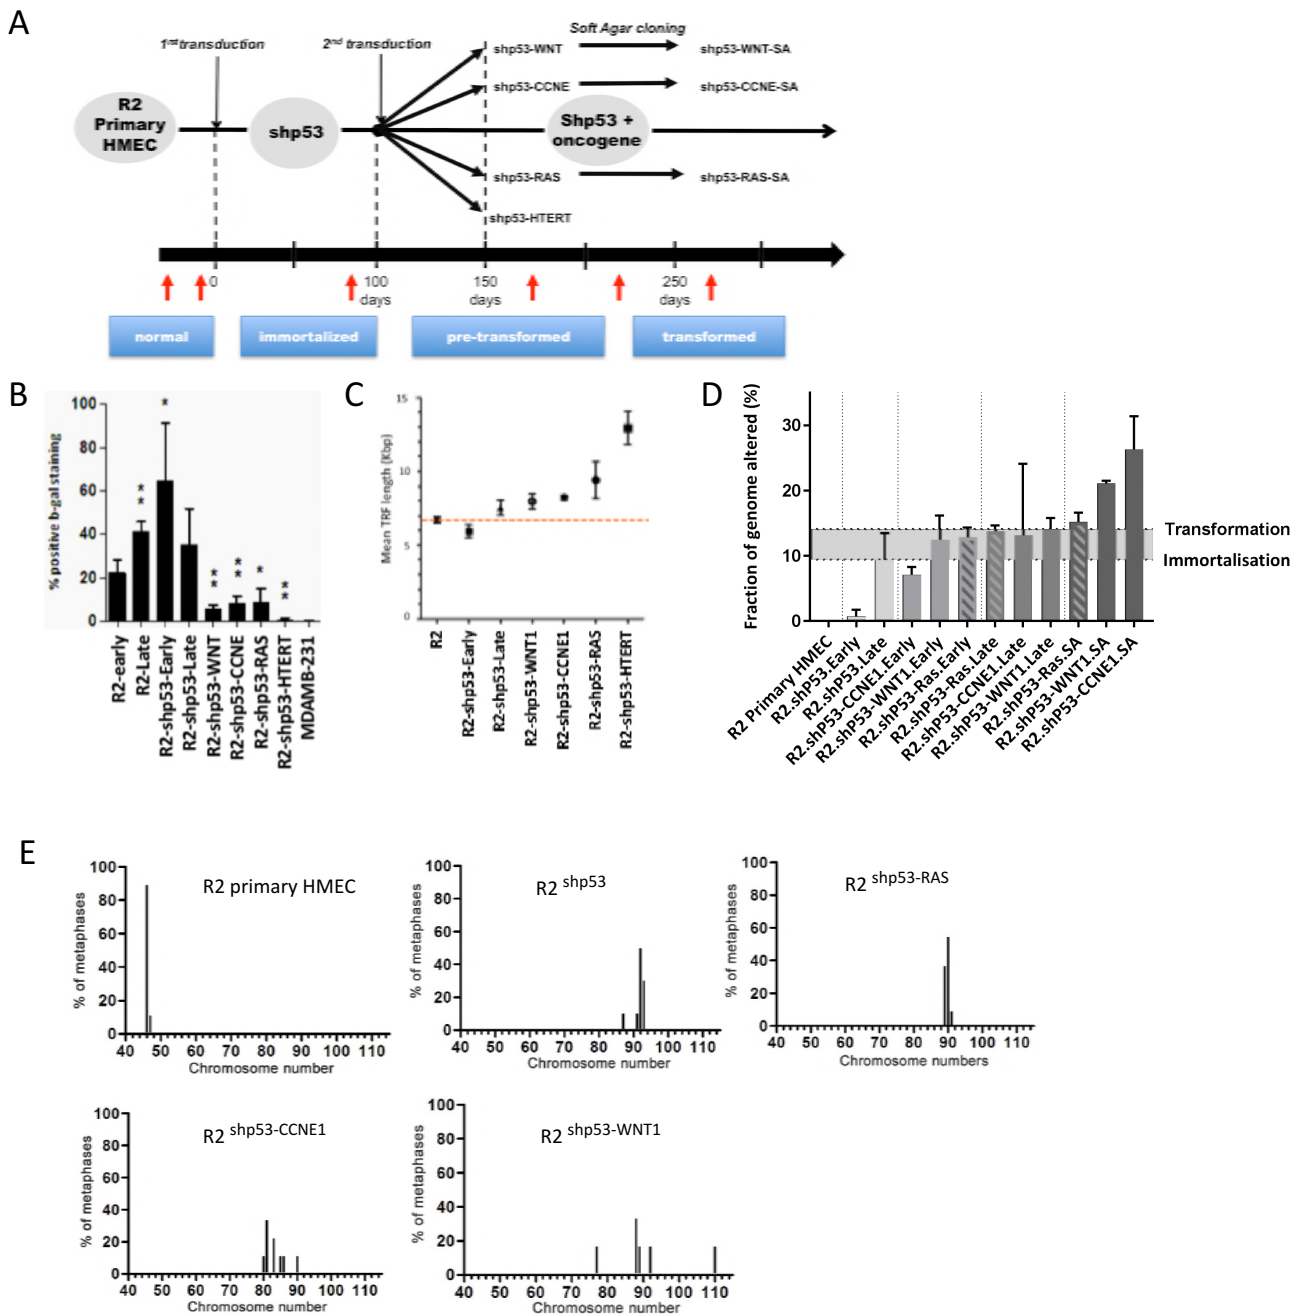

**Fig. 1: Stepwise transformation HMEC models.** **A:** experimental scheme of the subline production. **B:** percentage of B-galactosidase positive cells in the different HMEC variants. **C:** mean length of telomeres estimated by Southern blotting show a stabilization of telomere length in R2<sub>shp53.Late</sub> and transformed HMECs. **D:** fraction of the genome involved in Copy Number Alterations. Anova Multiple Comparisons test showed significant increase in genomic fraction involved in CNA between R2 primary HMEC and oncogene transduced sublines (R2 vs. R2.shP53-Ras  $p=0.0149$ ; R2 vs. R2.shP53-CCNE1 and shp53-WNT1  $p=0.0193$ ). Comparison of pretransformed and transformed (after Soft Agar) sublines showed that genomic fraction involved in CNA were significantly increased in shp53-CCNE1.SA and shp53-WNT1.SA cells (shP53-CCNE1/shp53-WNT1 vs. R2.shP53-CCNE1.SA/shp53-WNT1.SA  $p=0.0021$ ) but not in shp53-RAS.SA cells (shP53-Ras vs. shP53-Ras.SA  $p=0.9835$ ). **E:** chromosome numbers were estimated on chromosome spreads. At least 50 karyotypes were scored in each subline.

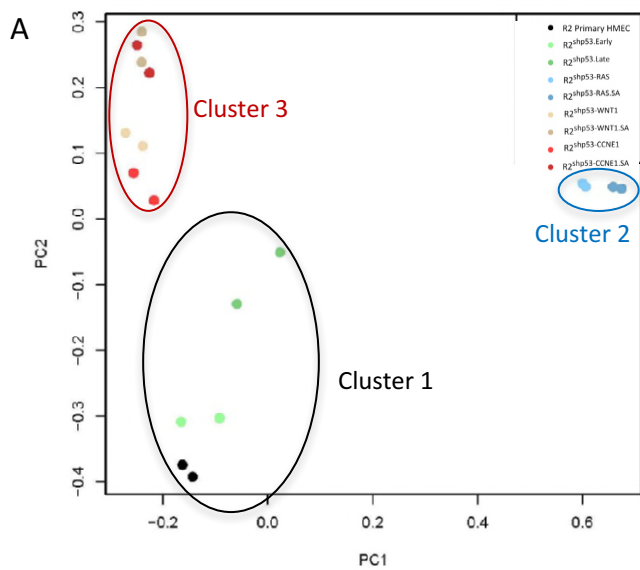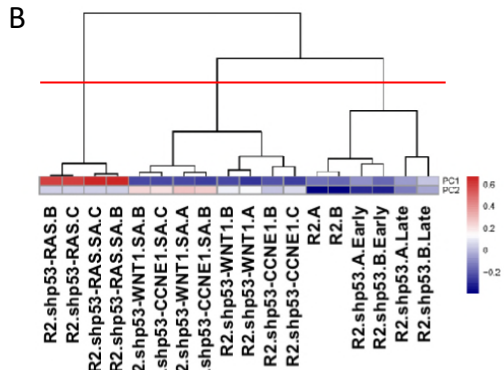

**Fig. 2:** A. Joint PCA analysis including CNA, DNA methylation, miR and mRNA data B. Non supervised hierarchical clustering (Ward) on PC1 and PC2 segregating in three clusters (red line threshold)

**A**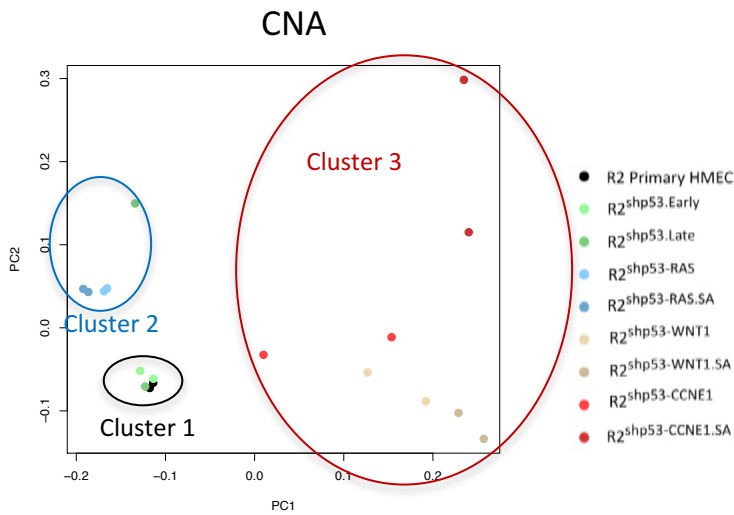**B**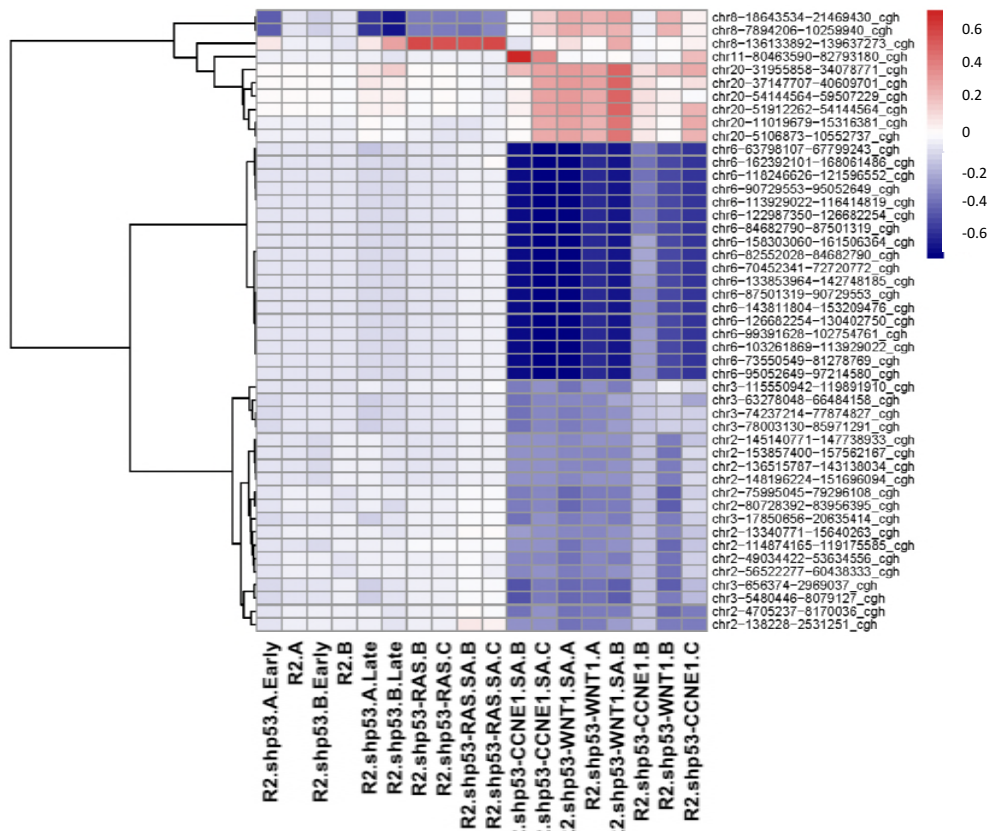

**Fig. 3: Copy Number Alterations profiles vary according to the oncogene expressed.** Copy Number Change analyses were performed on HG18 CGH 385K Whole Genome v2.0 array. Regions of gain or loss were determined using the Nexus 7.5 Software and intervals of at least 2 Mb selected. **A.:** PCA analysis of the CNAs. **B:** Ward clustering of the CNAs defining PC1 in the PCA analysis, color code of the heatmap is blue for loss, red for gain.

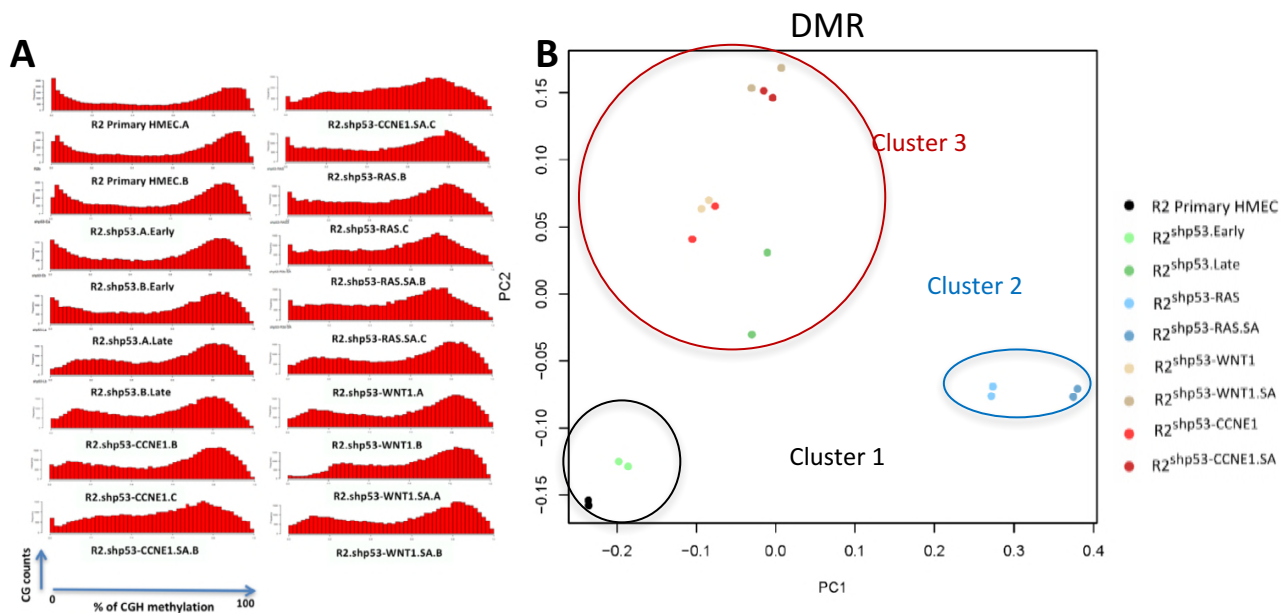

**Fig. 4: CpG methylation profiles show coordinated variation according to the oncogene expressed. A.** density histograms of RRBS methylation scores at CpGs sites (at least 5 contiguous CG) genome wide in primary R2 HMECs, shp53.Early, shp53.Late, shp53-CCNE1, shp53-CCNE1.SA (Soft Agar), shp53-WNT1, shp53-WNT1.SA, shp53-RAS, shp53-RAS.SA. **B.** PCA analysis of the most significantly varying DMRs. **C;** Ward clustering of the DMRs (without constraint concerning their location) defining PC1 in the PCA analysis, color code of the heatmap is red for hypermethylation, blue for hypomethylation.

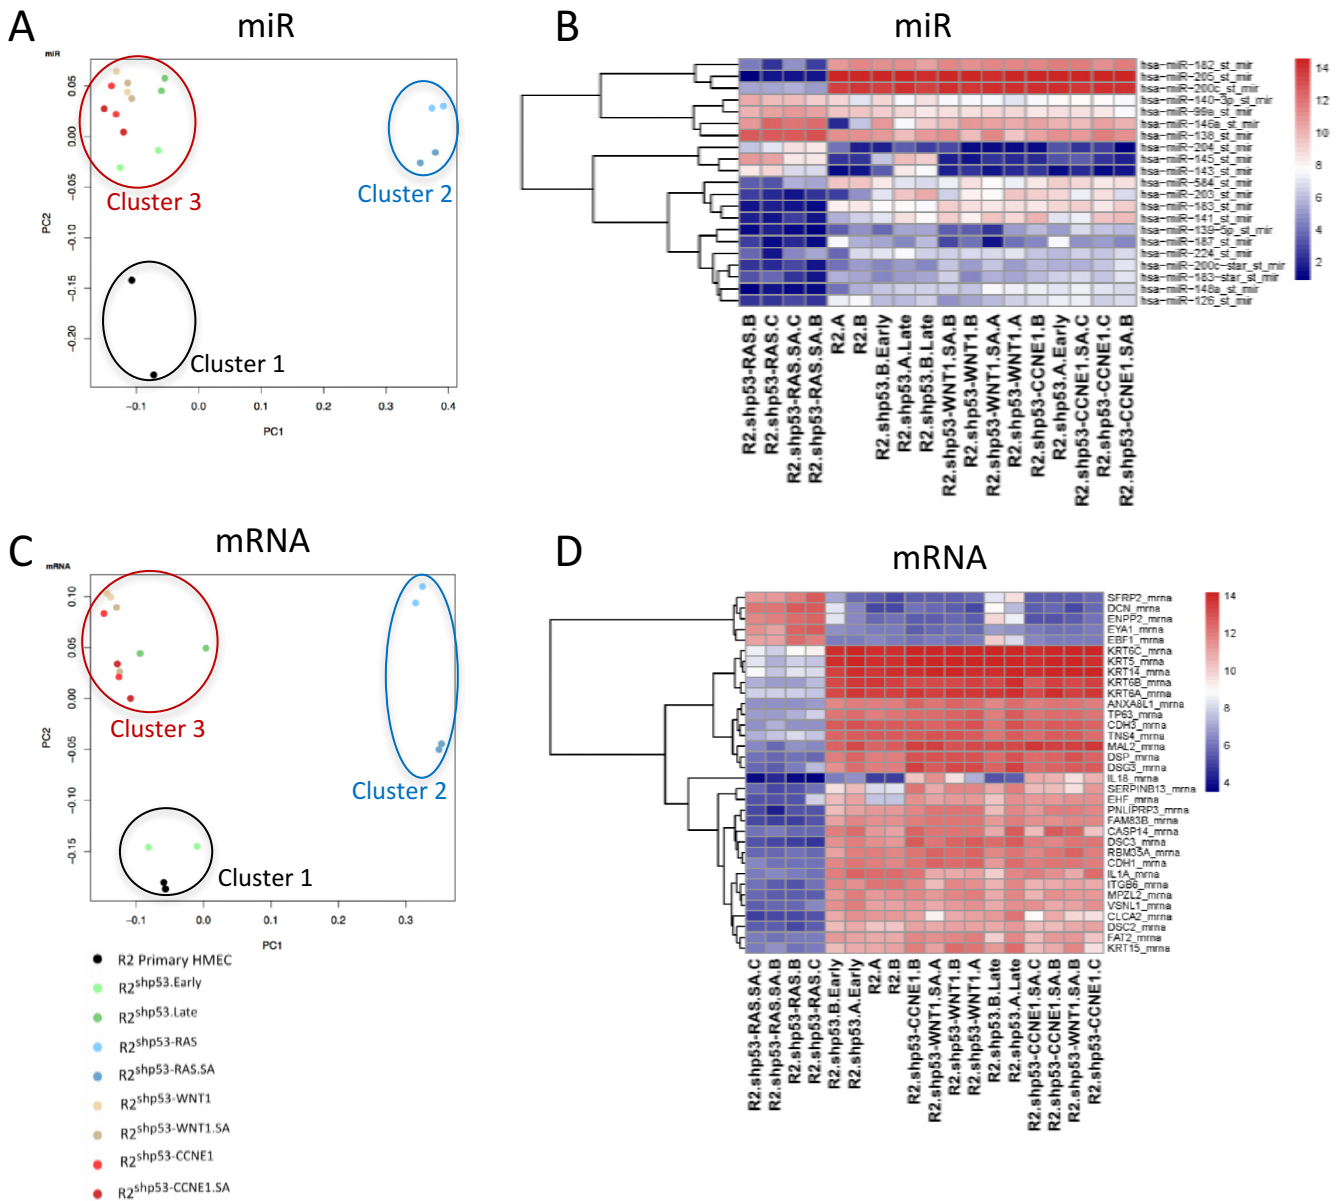

**Fig. 5: miR and mRNA expression profiles of the shp53-RAS show clear differences from those of shp53-CCNE1 and shp53-WNT1 sublines.** A: PCA analysis of the most significantly varying miR. B: Ward clustering of the miR defining PC1 in the PCA analysis, color code of the heatmap is red for overexpression, blue for underexpression. C: PCA analysis of the most significantly varying mRNA. (D) Ward clustering of the miR defining PC1 in the PCA analysis, color code of the heatmap is red for overexpression, blue for underexpression.



A

| Cluster | Gene Name       | Chrom band | CNA/Exp | Exp diff    | Cancer Gene<br>Ras pathway | Complete name                                      |
|---------|-----------------|------------|---------|-------------|----------------------------|----------------------------------------------------|
| RAS     | <b>ERBB2</b>    | 17q12      | Gain/OE | <b>2.07</b> |                            | erb-b2 receptor tyrosine kinase 2                  |
| RAS     | <b>PLAG1</b>    | 8q12.1     | Gain/OE | <b>9.53</b> |                            | PLAG1 zinc finger                                  |
| RAS     | <b>HEY1</b>     | 8q21.13    | Gain/OE | <b>6.95</b> |                            | hes related family bHLH transcription factor       |
| RAS     | <b>ZBTB10</b>   | 8q21.13    | Gain/OE | <b>1.79</b> |                            | zinc finger and BTB domain containing 10           |
| RAS     | <b>CRTC3</b>    | 15q26.1    | Gain/OE | <b>2.36</b> |                            | CREB regulated transcription coactivator 3         |
| RAS     | <b>SERPINB5</b> | 18q21.33   | Loss/UE | <b>0.41</b> |                            | serpin family B member 5 (Maspin)                  |
| RAS     | <b>TMEM154</b>  | 4q31.3     | Loss/UE | <b>0.15</b> |                            | transmembrane protein 154                          |
| RAS     | <b>LRAT</b>     | 4q32.1     | Loss/UE | <b>0.28</b> |                            | lecithin retinol acyltransferase                   |
| RAS     | <b>FBXW7</b>    | 4q31.3     | Loss/UE | <b>0.38</b> |                            | F-box and WD repeat domain containing 7            |
| RAS     | <b>AKAP6</b>    | 14q12      | Loss/UE | <b>0.53</b> |                            | A-kinase anchoring protein 6                       |
| RAS     | <b>MTUS1</b>    | 8p22       | Loss/UE | <b>0.13</b> |                            | microtubule associated scaffold protein 1          |
| C/W     | <b>NUMA1</b>    | 11q13.4    | Gain/OE | <b>2.76</b> |                            | nuclear mitotic apparatus protein 1                |
| C/W     | <b>PMS2</b>     | 7p22.1     | Gain/OE | <b>1.95</b> |                            | PMS1 homolog 2, mismatch repair system component   |
| C/W     | <b>PLAG1</b>    | 8q12.1     | Gain/OE | <b>1.58</b> |                            | PLAG1 zinc finger                                  |
| C/W     | <b>STAT3</b>    | 17q21.2    | Gain/OE | <b>1.47</b> |                            | signal transducer and activator of transcription 3 |
| C/W     | <b>CUX1</b>     | 7q22.1     | Gain/OE | <b>1.53</b> |                            | cut like homeobox 1                                |
| C/W     | <b>TGFBR2</b>   | 3p24.1     | Loss/UE | <b>0.52</b> |                            | transforming growth factor beta receptor 2         |
| C/W     | <b>CTNNB1</b>   | 3p22.1     | Loss/UE | <b>0.51</b> |                            | catenin beta 1                                     |
| C/W     | <b>FYN</b>      | 6q21       | Loss/UE | <b>0.54</b> |                            | FYN proto-oncogene, Src family tyrosine kinase     |
| C/W     | <b>PTPRK</b>    | 6q22.33    | Loss/UE | <b>0.65</b> |                            | protein tyrosine phosphatase, receptor type K      |
| C/W     | <b>PLAGL1</b>   | 6q24.2     | Loss/UE | <b>0.14</b> |                            | PLAG1 like zinc finger 1                           |
| C/W     | <b>AKAP12</b>   | 6q25.1     | Loss/UE | <b>0.33</b> |                            | A-kinase anchoring protein 12                      |
| C/W     | <b>LATS1</b>    | 6q25.1     | Loss/UE | <b>0.69</b> |                            | large tumor suppressor kinase 1                    |
| C/W     | <b>MAP3K7</b>   | 6q15       | Loss/UE | <b>0.52</b> |                            | mitogen-activated protein kinase kinase 7          |

B

| Cluster | Gene Name      | Chrom Band | mCpG/Exp | Exp Diff     | Complete name                                     |
|---------|----------------|------------|----------|--------------|---------------------------------------------------|
| RAS     | <b>KRT5</b>    | 12q13.13   | Hyper/UE | <b>-6.09</b> | keratin 5                                         |
| RAS     | <b>ITGB4</b>   | 17q25.1    | Hyper/UE | <b>-3.8</b>  | integrin subunit beta 4                           |
| RAS     | <b>OCIAD2</b>  | 4p11       | Hyper/UE | <b>-2.38</b> | OCIA domain containing 2                          |
| RAS     | <b>SLFN13</b>  | 17q12      | Hyper/UE | <b>-2.36</b> | schlafen family member 13                         |
| RAS     | <b>DMKN</b>    | 19q13.12   | Hyper/UE | <b>-2.08</b> | dermokine                                         |
| RAS     | <b>NUAK1</b>   | 12q23.3    | Hyper/UE | <b>-1.95</b> | NUAK family kinase 1                              |
| RAS     | <b>CYBSR2</b>  | 11p15.4    | Hyper/UE | <b>-1.84</b> | cytochrome b5 reductase 2                         |
| RAS     | <b>SLC7A5</b>  | 16q24.2    | Hyper/UE | <b>-1.82</b> | solute carrier family 7 member 5                  |
| RAS     | <b>PTPN6</b>   | 12p13.31   | Hyper/UE | <b>-1.76</b> | protein tyrosine phosphatase, non-receptor type 6 |
| RAS     | <b>MYEF2</b>   | 15q21.1    | Hyper/UE | <b>-1.72</b> | myelin expression factor 2                        |
| RAS     | <b>TAGLN3</b>  | 3q13.2     | Hyper/UE | <b>-1.52</b> | transgelin 3                                      |
| RAS     | <b>PKP3</b>    | 11p15.5    | Hyper/UE | <b>-1.47</b> | plakophilin 3                                     |
| RAS     | <b>ACPS</b>    | 19p13.2    | Hyper/UE | <b>-1.47</b> | acid phosphatase 5, tartrate resistant            |
| RAS     | <b>HK2</b>     | 2p12       | Hyper/UE | <b>-1.37</b> | hexokinase 2                                      |
| RAS     | <b>PROM2</b>   | 2q11.1     | Hyper/UE | <b>-1.35</b> | prominin 2                                        |
| RAS     | <b>KDF1</b>    | 1p36.11    | Hyper/UE | <b>-1.11</b> | keratinocyte differentiation factor 1             |
| RAS     | <b>GRAMD2</b>  | 15q23      | Hyper/UE | <b>-1.09</b> | GRAM domain containing 2A                         |
| RAS     | <b>TBX18</b>   | 6q14.3     | Hypo/OE  | <b>4.96</b>  | T-box 18                                          |
| RAS     | <b>ANPEP</b>   | 15q26.1    | Hypo/OE  | <b>2.55</b>  | alanyl aminopeptidase, membrane                   |
| RAS     | <b>ITGBL1</b>  | 13q33.1    | Hypo/OE  | <b>2.24</b>  | integrin subunit beta like 1                      |
| RAS     | <b>FRMD4A</b>  | 10p13      | Hypo/OE  | <b>1.03</b>  | FERM domain containing 4A                         |
| C/W     | <b>ANGPTL4</b> | 19p13.2    | Hyper/UE | <b>-3.41</b> | angiopoietin like 4                               |
| C/W     | <b>FBN2</b>    | 5q23.3     | Hyper/UE | <b>-3.37</b> | fibrillin 2                                       |
| C/W     | <b>PLAGL1</b>  | 6q24.2     | Hyper/UE | <b>-2.88</b> | PLAG1 like zinc finger 1                          |
| C/W     | <b>NRN1</b>    | 6p25.1     | Hyper/UE | <b>-2.44</b> | neuritin 1                                        |
| C/W     | <b>BCAT1</b>   | 12p12.1    | Hyper/UE | <b>-2.43</b> | branched chain amino acid transaminase 1          |
| C/W     | <b>UCHL1</b>   | 4p13       | Hyper/UE | <b>-2.00</b> | ubiquitin C-terminal hydrolase L1                 |
| C/W     | <b>EHD3</b>    | 2p23.1     | Hyper/UE | <b>-1.95</b> | EH domain containing 3                            |
| C/W     | <b>CYBSR2</b>  | 11p15.4    | Hyper/UE | <b>-1.68</b> | cytochrome b5 reductase 2                         |
| C/W     | <b>ITGB3</b>   | 17q21.32   | Hyper/UE | <b>-1.58</b> | integrin subunit beta 3                           |
| C/W     | <b>TAGLN3</b>  | 3q13.2     | Hyper/UE | <b>-1.47</b> | transgelin 3                                      |
| C/W     | <b>KCNK1</b>   | 11p15.1    | Hyper/UE | <b>-1.38</b> | potassium voltage-gated channel subfamily C 1     |
| C/W     | <b>RFTN1</b>   | 3p24.3     | Hyper/UE | <b>-1.29</b> | raftlin, lipid raft linker 1                      |
| C/W     | <b>DYSF</b>    | 2p13.2     | Hyper/UE | <b>-1.29</b> | dysferlin                                         |
| C/W     | <b>MYADM</b>   | 19q13.42   | Hyper/UE | <b>-1.19</b> | myeloid associated differentiation marker         |
| C/W     | <b>FGF5</b>    | 4q21.21    | Hyper/UE | <b>-1.04</b> | fibroblast growth factor 5                        |
| C/W     | <b>HBS1L</b>   | 6q23.3     | Hyper/UE | <b>-1.03</b> | HBS1 like translational GTPase                    |

**Fig. 6: Most significant gene expression differences due to copy number alterations (A) and differential methylation (B) in  $R2^{\text{shp53-RAS}}$  and  $R2^{\text{shp53-CCNE1}}/R2^{\text{shp53-WNT1}}$  HMECs.** Expression difference levels (Exp diff column) have been calculated relative to expression levels in the  $R2$  and  $R2^{\text{shp53}}$  cluster and indicated in log2 scale. Genes are listed for each cluster (RAS for  $R2^{\text{shp53-RAS}}$ , C/W for  $R2^{\text{shp53-CCNE1}}/R2^{\text{shp53-WNT1}}$ ). A: Genes modified as a consequence of CNA have been selected from a broader list on the basis of their assignment either as cancer or tumor suppressor genes (assembled under the cancer gene category) or as members of the RAS pathway. Highlighted in red, genes overexpressed in regions of gain (Gain/OE), in blue, genes underexpressed in regions of loss (Loss/UE). B: Genes modified as a consequence of differential methylation at the transcription start sites (TSS). In red, genes hypomethylated with increased expression (Hypo/OE), in blue, genes hypermethylated with reduced expression (Hyper/UE).

A

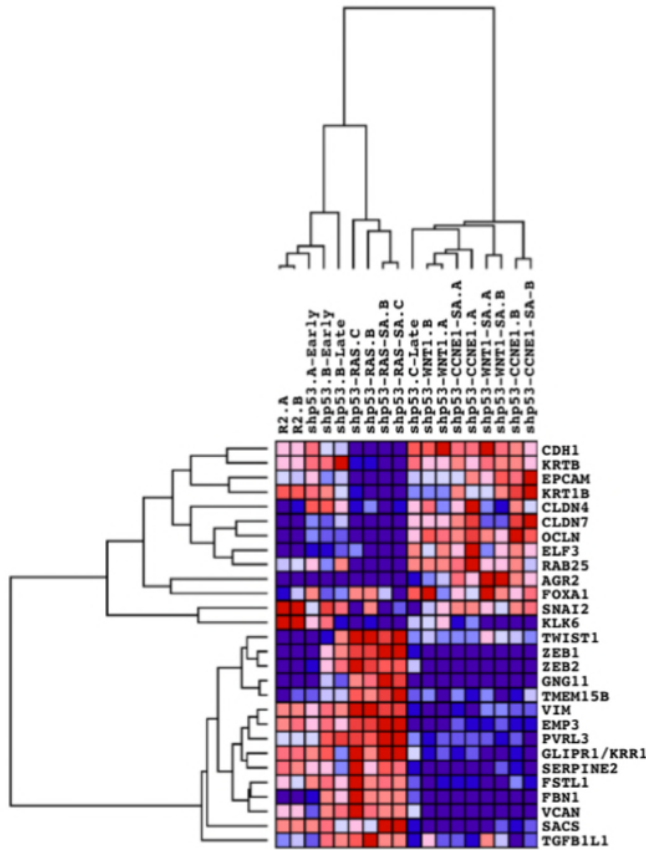

B

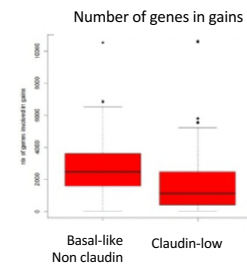

C

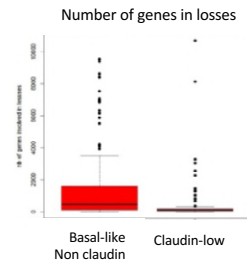

D

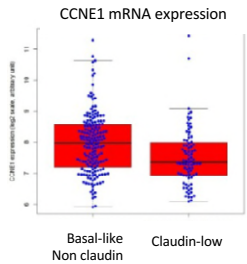

**Fig. 7: The different HMEC models resemble basal breast cancers and show varying levels of mesenchymal traits.** **A.** clustering analysis using a 28 gene signature representative of claudin low tumors. R2shp53-RAS models classified as strict claudin-low (mesenchymal), whereas R2shp53-CCNE1 and R2shp53-WNT1 were strictly epithelial. Of note, R2 (Ctrl here) and R2shp53 presented intermediate profiles combining elevated expression of both epithelial and mesenchymal genes. **B-C.** CNE1/WNT1 and RAS HMECs resemble respectively Basal-like and claudin-low breast cancers which show similar differences in CNA numbers, **D.** differences in CCNE1 mRNA expression levels. This analysis was done on 259 Basal-like tumors (PAM 50 classification) selected from the Metabric dataset which were split in Basal-Like/Non claudin (176) and Claudin-low (83).

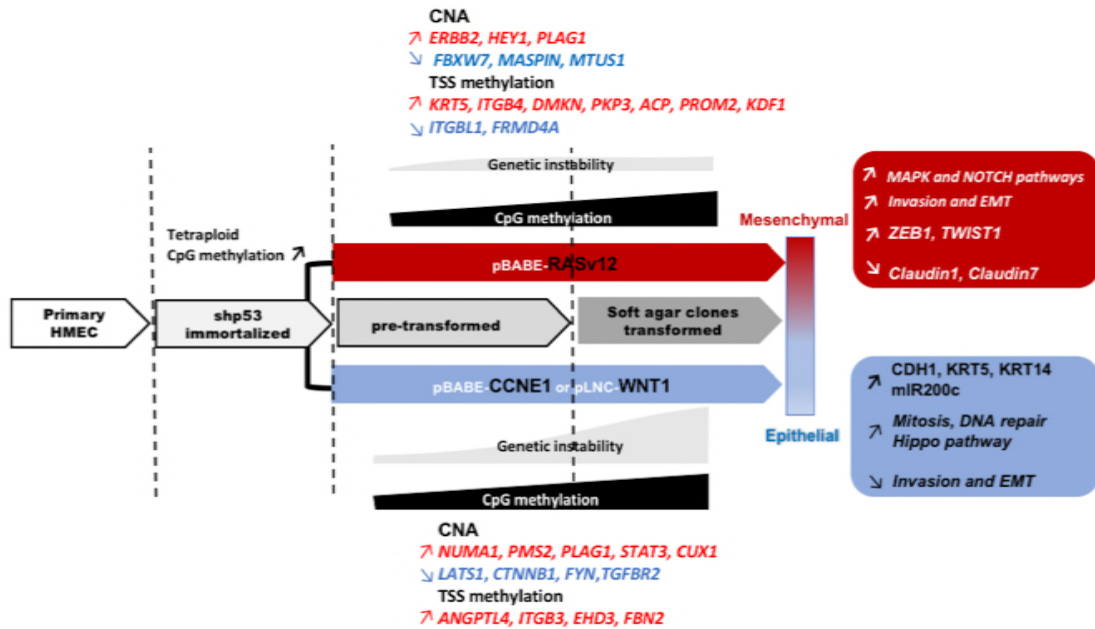

**Fig 8: Genetic, epigenetic and phenotypic modifications resulting from the transduction of distinct oncogenes in HMEC.** The changes occurring are depicted at different steps starting from primary HMEC and ending at transformed cells isolated from soft agar colonies. For readability purposes, only principal events and genes are presented. Arrows indicate upregulation or downregulation of expression of genes modified by CNAs or differential methylation at their TSS, as well as up or downregulation of pathways as part of the phenotypic consequences of the activation of the respective oncogenes.
